# Supplementary material for: Shrinkable/stretchable bis(calix[4]arenes) comprising photoreactive azobenzene or stilbene linkers
Source: Royal Society of Chemistry journal article supplement (doi:10.1039/d2qo01986h), 2023-01-01
Supplement: d2qo01986h1.pdf [file d2qo01986h1.pdf]

## **Shrinkable/stretchable bis(calix[4]arenes) comprising photoreactive azobenzene or stilbene linkers**

Ivan Lentin, Alexander Gorbunov, Stanislav Bezzubov, Valentina Nosova, Dmitry Cheshkov, Vladimir Kovalev, Ivan Vatsouro

### **Supplementary Information**

#### **Contents**

|                                                        |    |
|--------------------------------------------------------|----|
| Synthesis and characterization of novel compounds..... | 2  |
| NMR spectra of novel compounds .....                   | 13 |
| DOSY spectra of biscalixarene tetrakis(esters).....    | 31 |
| Details of X-ray diffraction measurements .....        | 33 |
| References .....                                       | 36 |

## Synthesis and characterization of novel compounds

*General experimental methods:*  $^1\text{H}$  and  $^{13}\text{C}$  NMR spectra were acquired on a Bruker Avance 400 instrument at 20 °C and chemical shifts are reported as ppm referenced to solvent signals. DOSY spectra were acquired on a Bruker Avance 600 instrument at 30 °C. ESI mass spectra were obtained from Sciex TripleTOF 5600+ spectrometers. Chemicals received from commercial sources were used without further purification. Compounds (*E*)-**1**,<sup>[S1]</sup> (*E*)-**2**,<sup>[S2]</sup> **3**,<sup>[S3]</sup> (*E*)-**5**, (*E*)-**6**,<sup>[S4]</sup> **7**<sup>[S5]</sup> and **8**,<sup>[S6]</sup> were prepared according to the published procedures. Photo-induced transformations were studied in NMR sample tubes (5 mm, Norell 506-P-7) or quartz cuvettes (10 mm) using a TLC irradiator (filtered 254, 312 or 365 nm wavelength, 6W mercury lamp light source). Preparative photochemical syntheses were performed in flasks made of quartz or borosilicate glass (Schott Duran) equipped with magnetic stirrer using a 120W high-pressure mercury lamp irradiator equipped with a quartz collimator, IR-filter (deionized water), and a UV-glass filter (max. transmission at 365 nm, ZWB2 or similar).

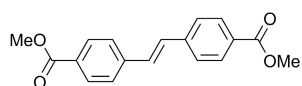

(*E*)-Dimethyl 4,4'-(ethene-1,2-diyl)dibenzoate (*E*)-**4**. A mixture of phosphonate **3** (2.86 g, 10.0 mmol), anhydrous  $\text{Cs}_2\text{CO}_3$  (4.89 g, 15.0 mmol) and dry DMF (30 mL) was stirred at room temperature for 10 min. Methyl 4-formylbenzoate (2.46 g, 15.0 mmol) was added and the mixture was stirred at room temperature for 48 h. The solvent was removed under reduced pressure and the residue was parted between dichloromethane and aqueous HCl (2 M). The organic layer was separated, washed with water, brine, and concentrated to almost dryness. The residue was re-crystallized from methanol. Yield 2.55 g (86%), white solid. Analytical data were the same as previously published.<sup>[S7]</sup>

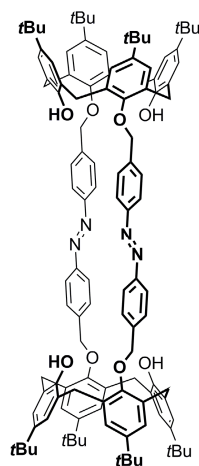

Biscalix[4]arene tetrol (*E,E*)-**9**. A mixture of calixarene **7** (1:1 toluene complex, 3.55 g, 4.80 mmol), anhydrous  $\text{K}_2\text{CO}_3$  (6.62 g, 48.0 mmol) and dry acetonitrile (400 mL) was stirred at reflux for 1.5 h. After cooling to room temperature, bis(bromomethyl)azobenzene (*E*)-**2** (2.12 g, 5.76 mmol) was added, and the mixture was stirred at reflux for 48 h. After cooling to room temperature, the solvent was removed under reduced pressure, the residue was quenched with aqueous HCl (2 M), and the products were extracted with dichloromethane. The organic solution was washed with water, brine, and dried with  $\text{Na}_2\text{SO}_4$ . The solvent was evaporated and the residue was subjected to column chromatography (silica, gradient from hexane to hexane/dichloromethane 3:2). The

collected sample was suspended in methanol, refluxed, cooled to room temperature, filtered and dried. Yield 1.26 g (31%), orange solid. M.p. >300 °C.  $^1\text{H}$  NMR (400 MHz,  $\text{CDCl}_3$ ):  $\delta$  = 7.94–7.89 (m, 8H;  $\text{ArH}_{\text{azo}}$ ), 7.86–7.82 (m, 8H;  $\text{ArH}_{\text{azo}}$ ), 7.71 (s, 4H; OH), 7.07 (s, 8H;  $\text{ArH}_{\text{calix}}$ ), 6.89 (s, 8H;  $\text{ArH}_{\text{calix}}$ ), 5.13 (s, 8H;  $\text{OCH}_2$ ), 4.37 (d, 8H,  $^2J$  = 12.9 Hz;  $\text{ArCH}_2\text{Ar}$ ), 3.38 (d, 8H,  $^2J$  = 12.9 Hz;  $\text{ArCH}_2\text{Ar}$ ), 1.28 (s, 36H;  $\text{C}(\text{CH}_3)_3$ ), 1.00 (s, 36H;  $\text{C}(\text{CH}_3)_3$ ) ppm;  $^{13}\text{C}$  NMR (100 MHz,  $\text{CDCl}_3$ ):  $\delta$  = 152.20, 150.83, 149.72, 147.27, 141.39, 139.95, 132.74 ( $\text{C}_{\text{Ar}}$ ), 127.44 ( $\text{CH}_{\text{Ar}}$ ), 127.34 ( $\text{C}_{\text{Ar}}$ ), 125.70, 125.06, 123.23 ( $\text{CH}_{\text{Ar}}$ ), 77.54 ( $\text{OCH}_2$ ), 34.01, 33.81 ( $\text{C}(\text{CH}_3)_3$ ), 31.88 ( $\text{ArCH}_2\text{Ar}$ ), 31.70, 31.03 ( $\text{C}(\text{CH}_3)_3$ ) ppm. ESI-MS  $m/z$ : 1733.0006  $[\text{M}+\text{Na}]^+$  for  $\text{C}_{116}\text{H}_{132}\text{NaN}_4\text{O}_8$  (1732.9971).

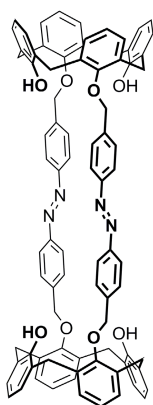

*Biscalix[4]arene tetrol (E,E)-10* was prepared as described for compound (*E,E*)-**9** from calixarene **8** (1.06 g, 2.50 mmol), anhydrous  $\text{K}_2\text{CO}_3$  (3.45 g, 25.0 mmol) and bis(bromomethyl)azobenzene (*E*)-**2** (1.10 g, 3.00 mmol) in dry acetonitrile (230 mL). The product was purified by column chromatography (silica, gradient from dichloromethane to dichloromethane/ethanol 200:1) followed by recrystallization from dichloromethane/hexane mixture. Yield 0.284 g (18%), orange solid. M.p. 273–275 °C.  $^1\text{H}$  NMR (400 MHz,  $\text{CDCl}_3$ ):  $\delta$  = 8.19 c (4H; OH), 7.97–7.91 (m, 8H;  $\text{ArH}_{\text{azo}}$ ), 7.79–7.74 (m, 8H;  $\text{ArH}_{\text{azo}}$ ), 7.09 (d, 8H,  $^3J$  = 7.5 Hz;  $\text{ArH}_{\text{calix}}$ ), 6.98 (d, 8H,  $^3J$  = 7.5 Hz;  $\text{ArH}_{\text{calix}}$ ), 6.85–6.80 (m, 4H;  $\text{ArH}_{\text{calix}}$ ), 6.68 (t, 4H,  $^3J$  = 7.5 Hz;  $\text{ArH}_{\text{calix}}$ ), 5.14 (s, 8H;  $\text{OCH}_2$ ), 4.41 (d, 8H,  $^2J$  = 13.0 Hz;  $\text{ArCH}_2\text{Ar}$ ), 3.46 (d, 8H,  $^2J$  = 13.0 Hz;  $\text{ArCH}_2\text{Ar}$ ) ppm;  $^{13}\text{C}$  NMR (100 MHz,  $\text{CDCl}_3$ ):  $\delta$  = 153.38, 152.15, 151.71, 139.68, 133.24 ( $\text{C}_{\text{Ar}}$ ), 129.25, 128.55 ( $\text{CH}_{\text{Ar}}$ ), 127.66 ( $\text{C}_{\text{Ar}}$ ), 127.38, 125.83, 123.32, 119.05 ( $\text{CH}_{\text{Ar}}$ ), 77.82 ( $\text{OCH}_2$ ), 31.53 ( $\text{ArCH}_2\text{Ar}$ ) ppm. ESI-MS  $m/z$ : 1278.5364  $[\text{M}+\text{NH}_4]^+$  for  $\text{C}_{84}\text{H}_{72}\text{N}_5\text{O}_8$  (1278.5375).

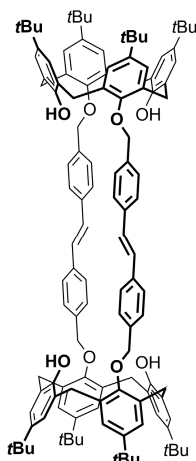

*Biscalix[4]arene tetrol (E,E)-11* was prepared as described for compound (*E,E*)-**9** from calixarene **7** (1:1 toluene complex, 3.02 g, 4.08 mmol), anhydrous  $\text{K}_2\text{CO}_3$  (5.64 g, 40.9 mmol) and bis(bromomethyl)stilbene (*E*)-**6** (1.79 g, 4.89 mmol) in dry acetonitrile (400 mL). Yield 1.15 g (33%), white solid. M.p. 279–281 °C (decomp.).  $^1\text{H}$  NMR (400 MHz,  $\text{CDCl}_3$ ):  $\delta$  = 7.81 (s, 4H; OH), 7.79–7.75 (m, 8H;  $\text{ArH}_{\text{stil}}$ ), 7.42–7.37 (m, 8H;  $\text{ArH}_{\text{stil}}$ ), 7.07 (s, 8H;  $\text{ArH}_{\text{calix}}$ ), 7.04 (s, 4H; CH), 6.89 (s, 8H;  $\text{ArH}_{\text{calix}}$ ), 5.07 (s, 8H;  $\text{OCH}_2$ ), 4.39 (d, 8H,  $^2J$  = 12.9 Hz;  $\text{ArCH}_2\text{Ar}$ ), 3.37 (d, 8H,  $^2J$  = 12.9 Hz;  $\text{ArCH}_2\text{Ar}$ ), 1.29 (s, 36H;  $\text{C}(\text{CH}_3)_3$ ), 1.00 (s, 36H;  $\text{C}(\text{CH}_3)_3$ ) ppm;  $^{13}\text{C}$  NMR (100 MHz,  $\text{CDCl}_3$ ):  $\delta$  = 150.89, 149.68, 147.15, 141.31, 136.94, 136.56, 132.77 ( $\text{C}_{\text{Ar}}$ ), 128.52 ( $\text{CH}_{\text{stil}}$ ), 127.39 ( $\text{C}_{\text{Ar}}$ ),

126.99, 126.80, 125.62, 125.02 ( $\text{CH}_{\text{Ar}}$ ), 77.65 ( $\text{OCH}_2$ ), 34.00, 33.80, ( $\text{C}(\text{CH}_3)_3$ ), 31.82 ( $\text{ArCH}_2\text{Ar}$ ), 31.71, 31.02 ( $\text{C}(\text{CH}_3)_3$ ) ppm. ESI-MS  $m/z$ : 1744.9897  $[\text{M}+\text{K}]^+$  for  $\text{C}_{120}\text{H}_{136}\text{K}\text{O}_8$  (1744.9900).

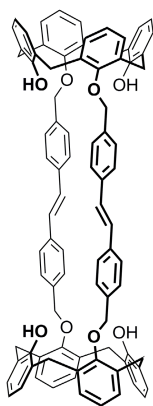

*Biscalix[4]arene tetrol (E,E)-12* was prepared as described for compound (*E,E*)-**9** from calixarene **8** (1.06 g, 2.50 mmol), anhydrous  $\text{K}_2\text{CO}_3$  (3.45 g, 25.0 mmol) and bis(bromomethyl)stilbene (*E*)-**6** (1.10 g, 3.01 mmol) in dry acetonitrile (230 mL). Yield 0.223 g (14%), white solid. M.p.  $>300$  °C.  $^1\text{H}$  NMR (400 MHz,  $\text{CDCl}_3$ ):  $\delta$  = 8.21 (s, 4H; OH), 7.81–7.76 (m, 8H;  $\text{ArH}_{\text{stil}}$ ), 7.40–7.35 (m, 8H;  $\text{ArH}_{\text{stil}}$ ), 7.09 (d, 8H,  $^3J = 7.5$  Hz;  $\text{ArH}_{\text{calix}}$ ), 7.01 (s, 4H; CH), 6.97 (d, 8H,  $^3J = 7.5$  Hz;  $\text{ArH}_{\text{calix}}$ ), 6.84–6.78 (m, 4H;  $\text{ArH}_{\text{calix}}$ ), 6.67 (t, 4H,  $^3J = 7.5$  Hz;  $\text{ArH}_{\text{calix}}$ ), 5.08 (s, 8H;  $\text{OCH}_2$ ), 4.43 (d, 8H,  $^2J = 13.0$  Hz;  $\text{ArCH}_2\text{Ar}$ ), 3.45 (d, 8H,  $^2J = 13.0$  Hz;  $\text{ArCH}_2\text{Ar}$ ) ppm;  $^{13}\text{C}$  NMR (100 MHz,  $\text{CDCl}_3$ ):  $\delta$  = 153.46, 151.79, 137.04, 136.25, 133.25 ( $\text{C}_{\text{Ar}}$ ), 129.18, 128.54 ( $\text{CH}_{\text{Ar}}$ ,  $\text{CH}_{\text{stil}}$ ), 127.74 ( $\text{C}_{\text{Ar}}$ ), 126.94, 126.93, 125.70, 118.98 ( $\text{CH}_{\text{Ar}}$ ), 78.01 ( $\text{OCH}_2$ ), 31.50 ( $\text{ArCH}_2\text{Ar}$ ) ppm. ESI-MS  $m/z$ : 1274.5562  $[\text{M}+\text{NH}_4]^+$  for  $\text{C}_{88}\text{H}_{76}\text{NO}_8$  (1274.5565).

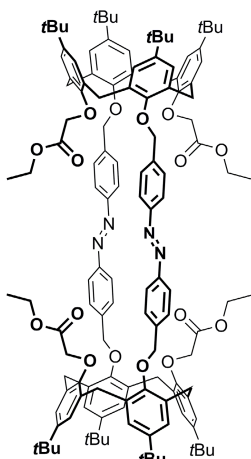

*Biscalixarene tetrakis(ester) (E,E)-13*. To a stirred suspension of bis(calixarene) (*E,E*)-**9** (0.342 g, 0.20 mmol) in dry THF (20 mL) sodium hydride (60%, 0.096 g, 2.40 mmol) was added followed by dry DMF (6.7 mL), and the mixture was stirred at room temperature for 1 h. Ethyl bromoacetate (0.266 mL, 2.40 mmol) was added and the mixture was stirred at 60 °C for 24 h. After cooling to room temperature, the mixture was quenched with aqueous HCl (2 M) and the products were extracted with dichloromethane. The extract was washed with water and brine, dried and evaporated to almost dryness. The residue was dissolved in a small volume of dichloromethane and methanol was added. The solid formed was collected, washed with methanol and dried. The product was purified by column chromatography (silica, gradient from dichloromethane to dichloromethane/ethanol 100:1). Yield 0.291 g (71%), orange solid. M.p.  $>300$  °C.  $^1\text{H}$  NMR (400 MHz,  $\text{CDCl}_3$ ):  $\delta$  = 7.93–7.88 (m, 8H;  $\text{ArH}_{\text{azo}}$ ), 7.79–7.75 (m, 8H;  $\text{ArH}_{\text{azo}}$ ), 7.11 (s, 8H;  $\text{ArH}_{\text{calix}}$ ), 6.55 (s, 8H;  $\text{ArH}_{\text{calix}}$ ), 4.82 (s, 8H;  $\text{OCH}_2$ ), 4.82 (d, 8H,  $^2J = 12.8$  Hz;  $\text{ArCH}_2\text{Ar}$ ), 4.76 (s, 8H;  $\text{OCH}_2$ ), 3.75 (q, 8H,  $^3J = 7.1$  Hz;  $\text{OCH}_2\text{CH}_3$ ), 3.31 (d, 8H,  $^2J = 12.8$  Hz;  $\text{ArCH}_2\text{Ar}$ ), 1.32 (s, 36H;  $\text{C}(\text{CH}_3)_3$ ), 1.00 (t, 12H,  $^3J = 7.1$  Hz;  $\text{OCH}_2\text{CH}_3$ ), 0.88 (s,  $\text{C}(\text{CH}_3)_3$ ) ppm;  $^{13}\text{C}$  NMR (100 MHz,  $\text{CDCl}_3$ ):  $\delta$  = 170.31 ( $\text{C}=\text{O}$ ), 152.86, 152.19, 152.09, 145.34, 145.01, 141.26, 135.01, 132.08 ( $\text{C}_{\text{Ar}}$ ), 129.08, 125.82, 124.87, 122.67 ( $\text{CH}_{\text{Ar}}$ ), 77.00 ( $\text{OCH}_2\text{Ar}$ ), 69.61 ( $\text{OCH}_2\text{CO}$ ), 59.85 ( $\text{OCH}_2\text{CH}_3$ ), 34.05, 33.66 ( $\text{C}(\text{CH}_3)_3$ ), 31.84 ( $\text{ArCH}_2\text{Ar}$ ), 31.65, 31.13

(C(CH<sub>3</sub>)<sub>3</sub>), 13.98 (OCH<sub>2</sub>CH<sub>3</sub>) ppm. ESI-MS *m/z*: 2055.1621 [M+H]<sup>+</sup> for C<sub>132</sub>H<sub>157</sub>N<sub>4</sub>O<sub>16</sub> (2055.1623).

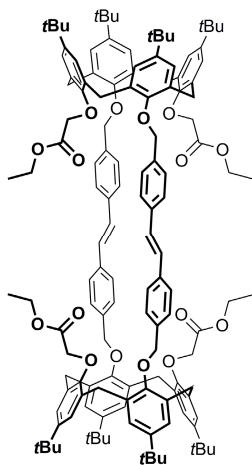

*Biscalixarene tetrakis(ester) (E,E)-14* was prepared as described for compound (*E,E*)-**13** from bis(calixarene) (*E,E*)-**11** (0.511 g, 0.30 mmol), sodium hydride (60%, 0.144 g, 3.60 mmol) and ethyl bromoacetate (0.399 mL, 3.60 mmol) in the mixture of dry THF (30 mL) and dry DMF (10 mL). Yield 0.344 g (56%), white solid. M.p. >300 °C. <sup>1</sup>H NMR (400 MHz, CDCl<sub>3</sub>): δ = 7.63–7.58 (m, 8H; ArH<sub>stil</sub>), 7.50–7.46 (m, 8H; ArH<sub>stil</sub>), 7.11 (s, 8H; ArH<sub>calix</sub>), 7.11 (s, 4H; CH), 6.53 (s, 8H; ArH<sub>calix</sub>), 4.81 (d, 8H, <sup>2</sup>J = 12.8 Hz; ArCH<sub>2</sub>Ar), 4.73 (s, 8H; OCH<sub>2</sub>), 4.70 (s, 8H; OCH<sub>2</sub>), 3.74 (q, 8H, <sup>3</sup>J = 7.1 Hz; OCH<sub>2</sub>CH<sub>3</sub>), 3.30 (d, 8H, <sup>2</sup>J = 12.8 Hz; ArCH<sub>2</sub>Ar), 1.33 (s, 36H; C(CH<sub>3</sub>)<sub>3</sub>), 1.01 (t, 12H, <sup>3</sup>J = 7.1 Hz; OCH<sub>2</sub>CH<sub>3</sub>), 0.87 (s, 36H; C(CH<sub>3</sub>)<sub>3</sub>) ppm; <sup>13</sup>C NMR (100 MHz, CDCl<sub>3</sub>): δ = 170.38 (C=O), 153.00, 152.36, 145.25, 144.86, 137.64, 136.55, 135.09, 132.02 (C<sub>Ar</sub>), 129.25, 128.30, 126.25, 125.78, 124.78 (CH<sub>ArH</sub>, CH<sub>stil</sub>), 77.42 (OCH<sub>2</sub>Ar), 69.55 (OCH<sub>2</sub>CO), 59.66 (OCH<sub>2</sub>CH<sub>3</sub>), 34.05, 33.64 (C(CH<sub>3</sub>)<sub>3</sub>), 31.87 (ArCH<sub>2</sub>Ar), 31.67, 31.13 (C(CH<sub>3</sub>)<sub>3</sub>), 14.06 (OCH<sub>2</sub>CH<sub>3</sub>) ppm. ESI-MS *m/z*: 1048.0769 [M+2Na]<sup>2+</sup> for C<sub>136</sub>H<sub>160</sub>Na<sub>2</sub>O<sub>16</sub> (1048.0762).

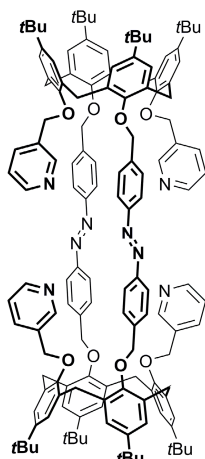

*Picolylated bis(calixarene) (E,E)-15*. To a stirred suspension of bis(calixarene) (*E,E*)-**9** (0.256 g, 0.15 mmol) in dry THF (27 mL) sodium hydride (60%, 0.180 g, 4.50 mmol) was added followed by dry DMF (3 mL), and the mixture was stirred at room temperature for 1 h. 3-(Chloromethyl)pyridine hydrochloride (0.246 g, 1.50 mmol) was added and the mixture was stirred at 60 °C for 48 h. After cooling to room temperature, the mixture was quenched with ethanol, and the solvents were removed under reduced pressure. The residue was suspended in dichloromethane, and the solution was washed with water, dried, and concentrated to dryness. The product was purified by column chromatography (silica, gradient from dichloromethane to dichloromethane/ethanol 50:1), the obtained solid was then washed with ether and then crystallized from methanol. Yield 0.106 g (34%), orange solid. M.p. >300 °C. <sup>1</sup>H NMR (400 MHz, CDCl<sub>3</sub>+CD<sub>3</sub>OD): δ = 8.54–8.50 (m, 4H; ArH<sub>Py</sub>), 8.36–8.32 (m, 4H; ArH<sub>Py</sub>), 7.64–7.55 (m, 12H; ArH<sub>azo</sub>, ArH<sub>Py</sub>), 7.44–7.38 (m, 8H; ArH<sub>azo</sub>), 7.05 (s, 8H; ArH<sub>calix</sub>), 6.94–6.88 (m, 4H; ArH<sub>Py</sub>), 6.68 (s, 8H; ArH<sub>calix</sub>), 5.08 (s, 8H; OCH<sub>2</sub>), 4.58 (s, 8H; OCH<sub>2</sub>), 4.39 (d, 8H, <sup>2</sup>J = 12.5 Hz; ArCH<sub>2</sub>Ar), 3.13 (d, 8H, <sup>2</sup>J = 12.5 Hz; ArCH<sub>2</sub>Ar), 1.28 (s, 36H; C(CH<sub>3</sub>)<sub>3</sub>), 0.94 (36H; C(CH<sub>3</sub>)<sub>3</sub>) ppm; <sup>13</sup>C NMR (100 MHz, CDCl<sub>3</sub>): δ =

151.82, 151.60 ( $C_{Ar}$ ), 149.43, 148.15 ( $CH_{Ar}$ ), 145.61, 144.90, 140.59 ( $C_{Ar}$ ), 137.04 ( $CH_{Ar}$ ), 134.73, 133.03, 132.48 ( $C_{Ar}$ ), 129.18, 125.42, 125.10, 122.85, 122.63 ( $CH_{Ar}$ ), 77.14 ( $OCH_2Ar$ ), 73.29 ( $OCH_2Py$ ), 33.90, 33.65 ( $C(CH_3)_3$ ), 31.42, 31.09 ( $C(CH_3)_3$ ), 30.51 ( $ArCH_2Ar$ ) ppm. ESI-MS  $m/z$ : 1038.0951  $[M+2H]^{2+}$  for  $C_{140}H_{154}N_8O_8$  (1038.0956).

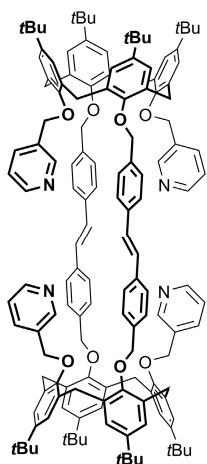

*Picolylated bis(calixarene) (E,E)-16* was prepared as described for compound (*E,E*)-**15** from bis(calixarene) (*E,E*)-**11** (0.128 g, 0.075 mmol), sodium hydride (60%, 0.108 g, 2.70 mmol) and 3-(chloromethyl)pyridine hydrochloride (0.148 g, 0.90 mmol) in THF (7.5 mL) and DMF (2.5 mL). The solid obtained after extraction was purified by crystallization from dichloromethane/methanol solvent mixture. Yield 0.118 g (76%), white solid. M.p.  $>300$  °C.  $^1H$  NMR (400 MHz,  $CDCl_3$ ):  $\delta$  = 8.43–8.40 (m, 4H;  $ArH_{Py}$ ), 8.39–8.36 (m, 4H;  $ArH_{Py}$ ), 7.69–7.64 (m, 4H;  $ArH_{Py}$ ), 7.29–7.24 (m, 8H;  $ArH_{stil}$ ), 7.21–7.16 (m, 8H;  $ArH_{stil}$ ), 7.10 (s, 8H;  $ArH_{calix}$ ), 6.98 (s, 4H; CH), 6.79–6.74 (m, 4H;  $ArH_{Py}$ ),

6.61 (s, 8H;  $ArH_{calix}$ ), 5.06 (s, 8H;  $OCH_2$ ), 4.49 (s, 8H;  $OCH_2$ ), 4.41 (d, 8H,  $^2J = 12.5$  Hz;  $ArCH_2Ar$ ), 3.14 (d, 8H,  $^2J = 12.5$  Hz;  $ArCH_2Ar$ ), 1.32 (s, 36H;  $C(CH_3)_3$ ), 0.89 (36H;  $C(CH_3)_3$ ) ppm;  $^{13}C$  NMR (100 MHz,  $CDCl_3+CD_3OD$ ):  $\delta$  = 151.81, 151.65 ( $C_{Ar}$ ), 148.90, 147.88 ( $CH_{Ar}$ ), 145.62, 144.73 ( $C_{Ar}$ ), 137.31 ( $CH_{Ar}$ ), 136.82, 136.71, 135.16, 133.33, 132.12 ( $C_{Ar}$ ), 128.93, 128.11, 126.20, 125.54, 124.90, 122.90 ( $CH_{Ar}$ , CH), 77.66 ( $OCH_2Ar$ ), 72.88 ( $OCH_2Py$ ), 33.93, 33.58 ( $C(CH_3)_3$ ), 31.48, 31.02 ( $C(CH_3)_3$ ), 30.51 ( $ArCH_2Ar$ ) ppm. ESI-MS  $m/z$ : 1036.1044  $[M+2H]^{2+}$  for  $C_{144}H_{158}N_4O_8$  (1036.1051).

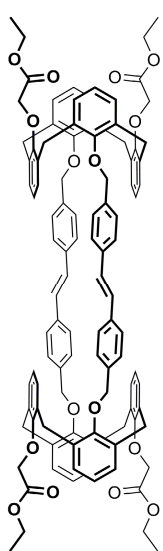

*Biscalixarene tetrakis(ester) (E,E)-17*. A mixture of bis(calixarene) (*E,E*)-**12** (0.207 g, 0.165 mmol),  $CS_2CO_3$  (0.431 g, 1.32 mmol) and ethyl bromoacetate (0.220 mL, 1.98 mmol) in dry DMF (15 mL) was stirred at room temperature for 48 h. The solvent was removed under reduced pressure and the residue was quenched with aqueous HCl (2 M). The products were extracted by dichloromethane, the solution was washed with water and brine, and dried. The solvent was evaporated and the residue was crystallized twice from ethanol. Yield 0.165 g (63%), white solid. M.p.  $>300$  °C.  $^1H$  NMR (400 MHz,  $CDCl_3$ ):  $\delta$  = 7.74–7.69 (m, 8H;  $ArH_{stil}$ ), 7.40 (s, 4H; CH), 7.26–7.19 (m, 16H;  $ArH_{stil,calix}$ ), 6.82 (t, 4H,  $^3J = 7.5$  Hz;  $ArH_{calix}$ ), 6.73 (d, 8H,  $^3J = 7.5$  Hz;  $ArH_{calix}$ ), 6.51 (t, 8H,  $^3J = 7.5$  Hz;  $ArH_{calix}$ ), 4.93 (s, 8H;  $OCH_2Ar$ ), 4.18 (q, 8H,  $^3J = 7.2$  Hz;  $OCH_2CH_3$ ), 3.96 (d, 8H,  $^2J = 14.7$  Hz;  $ArCH_2Ar$ ), 3.71 (d, 8H,  $^2J = 14.7$  Hz;  $ArCH_2Ar$ ), 3.56 (s, 8H;  $OCH_2CO$ ), 1.27 (t, 12H;  $^3J = 7.2$  Hz;  $OCH_2CH_3$ ) ppm;  $^{13}C$  NMR (100 MHz,  $CDCl_3$ ):  $\delta$  = 169.87



(C=O), 157.01, 155.23, 137.48, 135.98, 134.72, 133.39 ( $C_{Ar}$ ), 131.98, 130.60, 128.19, 126.91, 125.95, 123.10, 122.26 ( $CH_{Ar}$ , CH), 71.96 ( $OCH_2Ar$ ), 68.95 ( $OCH_2CO$ ), 60.42 ( $OCH_2CH_3$ ), 37.25 ( $ArCH_2Ar$ ), 14.18 ( $OCH_2CH_3$ ) ppm. ESI-MS  $m/z$ : 1602.6795  $[M+H]^+$  for  $C_{104}H_{97}O_{16}$  (1602.6805).

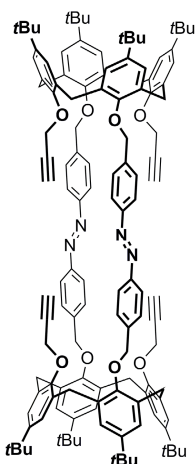

*Propargylated bis(calixarene) (E,E)-18* was prepared as described for compound (*E,E*)-**13** from bis(calixarene) (*E,E*)-**9** (0.409 g, 0.239 mmol), sodium hydride (60%, 0.115 g, 2.88 mmol) and propargyl bromide (80% in toluene, 0.321 mL, 2.88 mmol) in THF (18 mL) and DMF (2 mL). The solid obtained after extraction was purified by column chromatography (silica, gradient from hexane to hexane/dichloromethane 1:3). Yield 0.254 g (57%, contains traces of bis(calixarene) (*E,E*)-**19**), orange solid. M.p. 295–297 °C.

$^1H$  NMR (400 MHz,  $CDCl_3$ ):  $\delta$  = 8.01–7.97 (m, 8H;  $ArH_{azo}$ ), 7.88–7.83 (m, 8H;  $ArH_{azo}$ ), 7.17 (s, 8H;  $ArH_{calix}$ ), 6.50 (s, 8H;  $ArH_{calix}$ ), 4.76 (d, 8H,  $^4J$  = 2.4 Hz;  $OCH_2C\equiv CH$ ), 4.72 (s, 8H;  $OCH_2Ar$ ), 4.63 (d, 8H,  $^2J$  = 12.7 Hz;  $ArCH_2Ar$ ), 3.27 (d, 8H,  $^2J$  = 12.7 Hz;  $ArCH_2Ar$ ), 2.08 (t, 4H,  $^4J$  = 2.4 Hz;  $OCH_2C\equiv CH$ ), 1.37 (s, 36H;  $C(CH_3)_3$ ), 0.84 (s, 36H;  $C(CH_3)_3$ ) ppm;  $^{13}C$  NMR (100 MHz,  $CDCl_3$ ):  $\delta$  = 152.32, 152.12, 151.98, 145.94, 144.87, 141.04, 136.50, 131.79 ( $C_{Ar}$ ), 129.28, 125.49, 124.58, 123.01 ( $CH_{Ar}$ ), 80.68 ( $OCH_2C\equiv CH$ ), 77.37 ( $OCH_2Ar$ ), 75.08 ( $OCH_2C\equiv CH$ ), 59.26 ( $OCH_2C\equiv CH$ ), 34.19, 33.68 ( $C(CH_3)_3$ ), 31.71 ( $C(CH_3)_3$ ), 31.66 ( $ArCH_2Ar$ ), 31.10 ( $C(CH_3)_3$ ) ppm. ESI-MS  $m/z$ : 1863.0761  $[M+H]^+$  for  $C_{128}H_{141}N_4O_8$  (1863.0777).

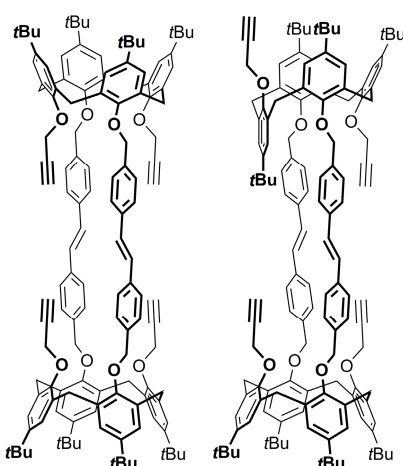

*Propargylated bis(calixarenes) (E,E)-20 and (E,E)-21* were prepared as described for compound (*E,E*)-**18** from bis(calixarene) (*E,E*)-**11** (0.445 g, 0.261 mmol), sodium hydride (60%, 0.125 g, 3.13 mmol) and propargyl bromide (80% in toluene, 0.349 mL, 3.13 mmol) in THF (10.8 mL) and DMF (1.2 mL). During the chromatographic purification a fraction containing a mixture of compounds (*E,E*)-**20** and (*E,E*)-**21** (~3:2, 0.192 g) was separated followed by a fraction containing pure compound (*E,E*)-**20** (0.169 g). Yield 0.362 g (75%).

Compound (*E,E*)-**20**: white solid. M.p. 289–291 °C (decomp.).  $^1H$  NMR (400 MHz,  $CDCl_3$ ):  $\delta$  = 7.70–7.66 (m, 8H;  $ArH_{stil}$ ), 7.60–7.55 (m, 8H;  $ArH_{stil}$ ), 7.21 (s, 4H; CH), 7.16 (s, 8H;  $ArH_{calix}$ ), 6.47 (s, 8H;  $ArH_{calix}$ ), 4.74 (d, 8H,  $^4J$  = 2.4 Hz;  $OCH_2C\equiv CH$ ), 4.64 (s, 8H;  $OCH_2Ar$ ), 4.62 (d, 8H,  $^2J$  = 12.8 Hz;  $ArCH_2Ar$ ), 3.25 (d, 8H,  $^2J$  = 12.8 Hz;  $ArCH_2Ar$ ), 2.03 (t,

4H,  $^4J = 2.4$  Hz;  $\text{OCH}_2\text{C}\equiv\text{CH}$ ), 1.36 (s, 36H;  $\text{C}(\text{CH}_3)_3$ ), 0.83 (s, 36H;  $\text{C}(\text{CH}_3)_3$ ) ppm;  $^{13}\text{C}$  NMR (100 MHz,  $\text{CDCl}_3$ ):  $\delta = 152.49, 152.10, 145.83, 144.69, 137.53, 136.69, 136.53, 131.80$  ( $\text{C}_{\text{Ar}}$ ), 129.08, 128.39, 126.49, 125.42, 124.49 ( $\text{CH}_{\text{Ar}}$ , CH), 80.80 ( $\text{OCH}_2\text{C}\equiv\text{CH}$ ), 77.63 ( $\text{OCH}_2\text{Ar}$ ), 74.83 ( $\text{OCH}_2\text{C}\equiv\text{CH}$ ), 59.22 ( $\text{OCH}_2\text{C}\equiv\text{CH}$ ), 34.17, 33.61 ( $\text{C}(\text{CH}_3)_3$ ), 31.71 ( $\text{C}(\text{CH}_3)_3$ ), 31.66 ( $\text{ArCH}_2\text{Ar}$ ), 31.10 ( $\text{C}(\text{CH}_3)_3$ ) ppm. ESI-MS  $m/z$ : 947.0787  $[\text{M}+2\text{NH}_4]^{2+}$  for  $\text{C}_{132}\text{H}_{152}\text{N}_2\text{O}_8$  (947.0786). Compound (*E,E*)-**21** (data extracted from the spectra of the (*E,E*)-**20** + (*E,E*)-**21** mixture):  $^1\text{H}$  NMR (400 MHz,  $\text{CDCl}_3$ ):  $\delta = 7.70\text{--}7.66$  (m, 4H;  $\text{ArH}_{\text{stil}}$ ), 7.64–7.61 (m, 4H;  $\text{ArH}_{\text{stil}}$ ), 7.60–7.56 (s, 4H;  $\text{ArH}_{\text{stil}}$ ), 7.55–7.52 (s, 4H;  $\text{ArH}_{\text{stil}}$ ), 7.19–7.15 (m, 6H;  $\text{CH}+\text{ArH}_{\text{calix}}$ ), 7.13 (s, 2H;  $\text{ArH}_{\text{calix}}$ ), 7.03 (d, 2H,  $^4J = 2.5$  Hz;  $\text{ArH}_{\text{calix}}$ ), 6.92 (s, 2H;  $\text{ArH}_{\text{calix}}$ ), 6.57 (d, 2H,  $^4J = 2.5$  Hz;  $\text{ArH}_{\text{calix}}$ ), 6.50–6.47 (m, 4H;  $\text{ArH}_{\text{calix}}$ ), 4.83 (d, 2H,  $^4J = 2.5$  Hz;  $\text{OCH}_2\text{C}\equiv\text{CH}$ ), 4.71 (d, 2H,  $^4J = 2.5$  Hz;  $\text{OCH}_2\text{C}\equiv\text{CH}$ ), 4.66 (d, 2H,  $^2J = 12.6$  Hz;  $\text{ArCH}_2\text{Ar}$ ), 4.65–4.59 (m, 10H;  $\text{OCH}_2\text{Ar}+\text{ArCH}_2\text{Ar}$ ), 4.46 (d, 2H,  $^4J = 2.5$  Hz;  $\text{OCH}_2\text{C}\equiv\text{CH}$ ), 4.39 (d, 2H,  $^2J = 13.1$  Hz;  $\text{ArCH}_2\text{Ar}$ ), 4.21 (d, 2H,  $^4J = 2.5$  Hz;  $\text{OCH}_2\text{C}\equiv\text{CH}$ ), 3.77 (d, 2H,  $^2J = 14.2$  Hz;  $\text{ArCH}_2\text{Ar}$ ), 3.75 (d, 2H,  $^2J = 14.2$  Hz;  $\text{ArCH}_2\text{Ar}$ ), 3.28 (d, 2H,  $^2J = 12.6$  Hz;  $\text{ArCH}_2\text{Ar}$ ), 3.26 (d, 2H,  $^2J = 12.8$  Hz;  $\text{ArCH}_2\text{Ar}$ ), 3.24 (2H,  $^2J = 12.6$  Hz;  $\text{ArCH}_2\text{Ar}$ ), 2.48 (t, 2H,  $^4J = 2.5$  Hz;  $\text{OCH}_2\text{C}\equiv\text{CH}$ ), 2.22 (t, 2H,  $^4J = 2.5$  Hz;  $\text{OCH}_2\text{C}\equiv\text{CH}$ ), 2.21 (t, 2H,  $^4J = 2.5$  Hz;  $\text{OCH}_2\text{C}\equiv\text{CH}$ ), 2.09 (t, 2H,  $^4J = 2.5$  Hz;  $\text{OCH}_2\text{C}\equiv\text{CH}$ ), 1.38 (s, 9H;  $\text{C}(\text{CH}_3)_3$ ), 1.37 (s, 18H;  $\text{C}(\text{CH}_3)_3$ ), 1.07 (s, 18H;  $\text{C}(\text{CH}_3)_3$ ), 0.84 (s, 18H;  $\text{C}(\text{CH}_3)_3$ ), 0.64 (s, 9H;  $\text{C}(\text{CH}_3)_3$ ) ppm;  $^{13}\text{C}$  NMR (100 MHz,  $\text{CDCl}_3$ ):  $\delta = 153.94, 153.42, 152.54, 151.75, 151.16, 145.92, 145.90, 145.54, 144.74, 144.55, 144.31, 137.45, 137.15, 137.08, 136.82, 136.66, 136.62, 132.77, 132.03, 131.74, 131.39$  ( $\text{C}_{\text{Ar}}$ ), 129.45, 129.17, 128.67, 128.42, 128.34, 126.78, 126.62, 126.07, 125.28, 124.56 ( $\text{CH}_{\text{Ar}}$ , CH), 81.07, 80.99, 80.86, 80.71 ( $\text{OCH}_2\text{C}\equiv\text{CH}$ ), 77.74, 76.43 ( $\text{OCH}_2\text{Ar}$ ), 75.29, 75.27, 74.88, 74.36 ( $\text{OCH}_2\text{C}\equiv\text{CH}$ ), 59.18, 59.06, 59.00, 57.41 ( $\text{OCH}_2\text{C}\equiv\text{CH}$ ), 37.60 ( $\text{ArCH}_2\text{Ar}$ ), 34.19, 33.77, 33.28 ( $\text{C}(\text{CH}_3)_3$ ), 31.91, 31.69, 31.45, 30.42. ( $\text{ArCH}_2\text{Ar}$ ,  $\text{C}(\text{CH}_3)_3$ ) ppm.

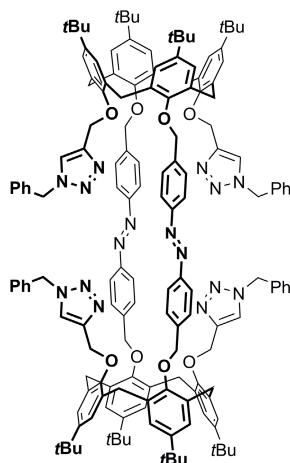

*Biscalixarene tetrakis(triazole) (E,E)-22*. To a stirred suspension of copper(I) iodide (0.015 g, 0.079 mmol) in toluene (20 mL) triethylamine (0.216 mL, 1.55 mmol) was added, and the mixture was stirred at room temperature until a clear solution formed. A solution of bis(calixarene) (*E,E*)-**18** (containing traces of bis(calixarene) (*E,E*)-**19**, 0.241 g, 0.130 mmol) in dichloromethane (20 mL) was added followed by benzylazide (0.083 g, 0.624 mmol), and the mixture was stirred at room temperature under inert atmosphere for 24 h. The solvents were removed under reduced pressure, the residue was dissolved in dichloromethane and washed continuously (for 2 h) with aqueous HCl (2 M) at vigorous stirring. The organic



phase was separated, washed with aqueous Na<sub>2</sub>SO<sub>3</sub> (5%) and water, dried, and the solvent was evaporated. The product was purified by column chromatography (silica, gradient from dichloromethane to dichloromethane/ethanol 100:1) followed by crystallization from hexane. Yield 0.131 g (42%, orange solid). M.p. >300 °C. <sup>1</sup>H NMR (400 MHz, CDCl<sub>3</sub>): δ = 7.78–7.74 (m, 8H; ArH<sub>azo</sub>), 7.69–7.65 (m, 8H; ArH<sub>azo</sub>), 7.27–7.23 (m, 12H; ArH<sub>Ph</sub>), 7.06–7.00 (m, 8H; ArH<sub>Ph</sub>), 6.78 (s, 4H; ArH<sub>Trz</sub>), 6.70 (s, 8H; ArH<sub>calix</sub>), 6.67 (s, 8H; ArH<sub>calix</sub>), 5.30 (s, 8H; NCH<sub>2</sub>), 5.20 (s, 8H; OCH<sub>2</sub>Trz), 4.70 (s, 8H; OCH<sub>2</sub>Ar), 4.31 (d, 8H, <sup>2</sup>J = 12.6 Hz; ArCH<sub>2</sub>Ar), 2.92 (d, 8H, <sup>2</sup>J = 12.6 Hz; ArCH<sub>2</sub>Ar), 1.07 (s, 36H; C(CH<sub>3</sub>)<sub>3</sub>), 1.04 (s, 36H; C(CH<sub>3</sub>)<sub>3</sub>) ppm; <sup>13</sup>C NMR (100 MHz, CDCl<sub>3</sub>): δ = 152.98, 151.95, 150.81, 144.86, 144.71 (C<sub>Ar</sub>), 144.26 (C<sub>Ar,Trz</sub>), 141.27, 135.01, 134.50, 133.32 (C<sub>Ar</sub>), 129.85, 128.87, 128.40, 127.62, 125.05, 124.88 (CH<sub>Ar</sub>), 123.64 (CH<sub>Ar,Trz</sub>), 122.80 (CH<sub>Ar</sub>), 76.56 (OCH<sub>2</sub>Ar), 65.27 (OCH<sub>2</sub>Trz), 53.64 (NCH<sub>2</sub>), 33.80, 33.77 (C(CH<sub>3</sub>)<sub>3</sub>), 31.47 (ArCH<sub>2</sub>Ar), 31.41, 31.35 (C(CH<sub>3</sub>)<sub>3</sub>) ppm. ESI-MS *m/z*: 1198.1695 [M+2H]<sup>2+</sup> for C<sub>156</sub>H<sub>170</sub>N<sub>16</sub>O<sub>8</sub> (1198.1705).

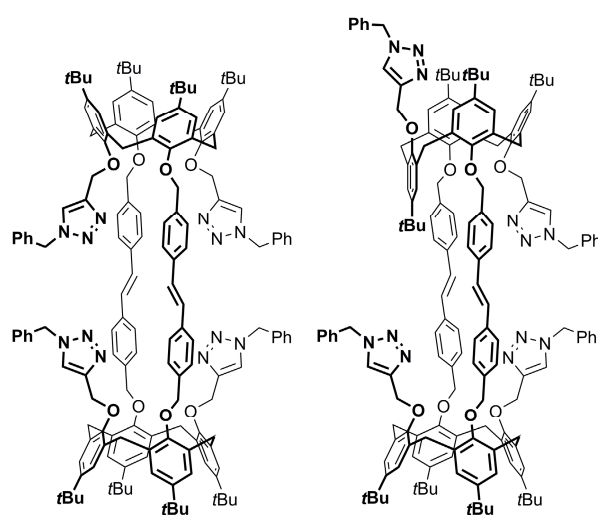

*Biscalixarene tetrakis(triazoles) (E,E)-23 and (E,E)-24* were prepared as described for compound *(E,E)-22* from the mixture of bis(calixarenes) *(E,E)-20* and *(E,E)-21* (~3:2, 0.192 g, 0.104 mmol), copper(I) iodide (0.012 g, 0.062 mmol), triethylamine (0.173 mL, 1.24 mmol) and benzylazide (0.066 g, 0.498 mmol) in toluene (17.5 mL) and dichloromethane (17.5 mL). After the extraction step, the product mixture was separated by the

column chromatography (silica, gradient from dichloromethane to dichloromethane/ethanol 100:1), and each of the products was additionally purified by crystallization from hexane. Compound *(E,E)-23*: Yield 0.079 g (32%, white solid). M.p. >300 °C. <sup>1</sup>H NMR (400 MHz, CDCl<sub>3</sub>): δ = 7.57–7.53 (m, 8H; ArH<sub>stil</sub>), 7.36–7.31 (m, 8H; ArH<sub>stil</sub>), 7.20–7.15 (m, 12H; ArH<sub>Ph</sub>), 6.96–6.91 (m, 8H; ArH<sub>Ph</sub>), 6.88 (s, 8H; ArH<sub>calix</sub>), 6.84 (s, 4H; CH or ArH<sub>Trz</sub>), 6.83 (s, 4H; CH or ArH<sub>Trz</sub>), 6.56 (s, 8H; ArH<sub>calix</sub>), 5.28 (s, 8H; NCH<sub>2</sub>), 5.19 (s, 8H; OCH<sub>2</sub>Trz), 4.63 (s, 8H; OCH<sub>2</sub>Ar), 4.37 (d, 8H, <sup>2</sup>J = 12.6 Hz; ArCH<sub>2</sub>Ar), 3.02 (d, 8H, <sup>2</sup>J = 12.6 Hz; ArCH<sub>2</sub>Ar), 1.20 (s, 36H; C(CH<sub>3</sub>)<sub>3</sub>), 0.93 (s, 36H; C(CH<sub>3</sub>)<sub>3</sub>) ppm; <sup>13</sup>C NMR (100 MHz, CDCl<sub>3</sub>): δ = 152.79, 151.27, 145.01, 144.58 (C<sub>Ar</sub>), 144.47 (C<sub>Ar,Trz</sub>), 137.61, 136.72, 135.40, 135.16, 132.42 (C<sub>Ar</sub>), 129.17, 128.76, 128.32, 128.25, 127.33, 126.61, 125.18, 124.78 (CH<sub>Ar</sub>, CH), 123.92 (CH<sub>Ar,Trz</sub>), 77.32 (OCH<sub>2</sub>Ar), 64.87 (OCH<sub>2</sub>Trz), 53.42 (NCH<sub>2</sub>), 33.93, 33.68 (C(CH<sub>3</sub>)<sub>3</sub>), 31.57 (C(CH<sub>3</sub>)<sub>3</sub>), 31.51

(ArCH<sub>2</sub>Ar), 31.23 (C(CH<sub>3</sub>)<sub>3</sub>) ppm. ESI-MS *m/z*: 2391.3503 [M+H]<sup>+</sup> for C<sub>160</sub>H<sub>173</sub>N<sub>12</sub>O<sub>8</sub> (2391.3527). Compound (*E,E*)-**24**: Yield 0.054 g (22%, white solid). M.p. 279–281 °C (decomp.). <sup>1</sup>H NMR (400 MHz, CDCl<sub>3</sub>): δ = 7.68–7.63 (m, 4H; ArH<sub>stil</sub>), 7.63–7.58 (m, 4H; ArH<sub>stil</sub>), 7.48–7.44 (m, 4H; ArH<sub>stil</sub>), 7.44–7.40 (m, 4H; ArH<sub>stil</sub>), 7.40–7.37 (m), 7.33–7.20 (m), 7.15–7.06 (m), 7.04–6.96 (m), 6.92 (s), 6.89–6.85 (m), 6.79–6.74 (m), 6.70 (s), 6.53 (s), 6.49 (s, <sup>2</sup>*J* = 2.3 Hz), 6.48 (s), 6.49–6.46 (m) (44H, ArH<sub>Ph</sub>+ArH<sub>calix</sub>+ArH<sub>Trz</sub>+CH), 5.51 (s, 2H; NCH<sub>2</sub>), 5.40 (s, 2H; NCH<sub>2</sub>), 5.25 (s, 2H; NCH<sub>2</sub>), 5.24 (s, 2H; NCH<sub>2</sub>), 5.23 (s, 2H; OCH<sub>2</sub>Trz), 5.14 (s, 2H; OCH<sub>2</sub>Trz), 4.91 (s, 2H; OCH<sub>2</sub>Trz), 4.79 (s, 2H; OCH<sub>2</sub>Trz), 4.70 (d, 2H, <sup>2</sup>*J* = 10.5 Hz; OCH<sub>2</sub>Ar), 4.59 (s, 4H, OCH<sub>2</sub>Ar), 4.54 (d, 2H, <sup>2</sup>*J* = 10.5 Hz; OCH<sub>2</sub>Ar), 4.47 (d, 2H, <sup>2</sup>*J* = 12.5 Hz; ArCH<sub>2</sub>Ar), 4.34 (d, 2H, <sup>2</sup>*J* = 12.5 Hz; ArCH<sub>2</sub>Ar), 4.20 (d, 2H, <sup>2</sup>*J* = 12.9 Hz; ArCH<sub>2</sub>Ar), 3.72 (d, 2H, <sup>2</sup>*J* = 13.5 Hz; ArCH<sub>2</sub>Ar), 3.58 (d, 2H, <sup>2</sup>*J* = 13.5 Hz; ArCH<sub>2</sub>Ar), 3.12 (d, 2H, <sup>2</sup>*J* = 12.7 Hz; ArCH<sub>2</sub>Ar), 3.07 (d, 2H, <sup>2</sup>*J* = 12.7 Hz; ArCH<sub>2</sub>Ar), 3.04 (d, 2H, <sup>2</sup>*J* = 12.9 Hz; ArCH<sub>2</sub>Ar), 1.30 (s, 9H; C(CH<sub>3</sub>)<sub>3</sub>), 1.29 (s, 9H; C(CH<sub>3</sub>)<sub>3</sub>), 1.28 (s, 9H; C(CH<sub>3</sub>)<sub>3</sub>), 0.95 (s, 18H; C(CH<sub>3</sub>)<sub>3</sub>), 0.86 (s, 18H; C(CH<sub>3</sub>)<sub>3</sub>), 0.74 (s, 9H; C(CH<sub>3</sub>)<sub>3</sub>) ppm; <sup>13</sup>C NMR (100 MHz, CDCl<sub>3</sub>): δ = 153.83, 153.53, 152.48, 151.39, 151.20, 150.43, 145.22, 145.19, 144.71, 144.65, 144.59, 144.51, 144.47, 144.08, 143.93, 143.78, 137.49, 137.41, 136.90, 136.87, 136.30, 136.05, 136.03, 135.41, 135.23, 135.15, 134.55, 133.04, 131.99, 131.82, 131.47 (C<sub>Ar</sub>) 129.37, 129.09, 129.07, 128.76, 128.74, 128.73, 128.62, 128.58, 128.48, 128.23, 128.20, 128.17, 128.08, 128.01, 127.25, 127.02, 126.76, 126.74, 125.93, 125.37, 125.34, 124.91, 124.66, 124.61, 124.11, 124.06, 123.66, 123.24 (CH<sub>Ar</sub>, CH), 77.68, 76.35 (OCH<sub>2</sub>Ar), 64.71, 64.65, 64.11, 61.09 (OCH<sub>2</sub>Trz), 54.05, 53.33, 53.21, 53.14 (NCH<sub>2</sub>), 37.46 (ArCH<sub>2</sub>Ar), 34.00, 33.94, 33.62, 33.60, 33.40 (C(CH<sub>3</sub>)<sub>3</sub>), 32.05 (ArCH<sub>2</sub>Ar), 31.66, 31.65 (C(CH<sub>3</sub>)<sub>3</sub>), 31.53, 31.42 (ArCH<sub>2</sub>Ar), 31.30, 31.12, 30.76 (C(CH<sub>3</sub>)<sub>3</sub>) ppm. ESI-MS *m/z*: 2391.3513 [M+H]<sup>+</sup> for C<sub>160</sub>H<sub>173</sub>N<sub>12</sub>O<sub>8</sub> (2391.3527).

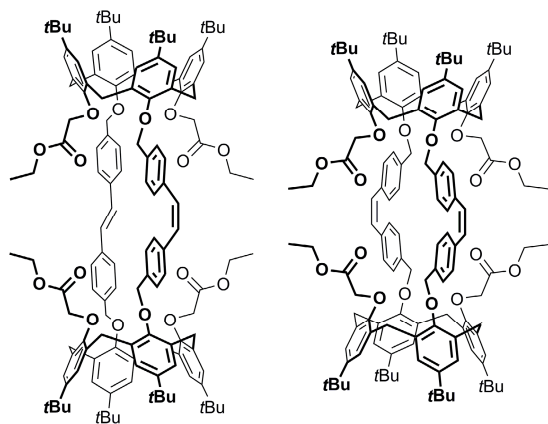

*Biscalixarene tetrakis(esters) (E,Z)-14 and (Z,Z)-14.*

A stirred solution of tetrakis(ester) (*E,E*)-**14** (0.123 g, 0.06 mmol) and 1,2-benzanthracene (0.055 g, 0.24 mmol) in benzene/methanol (9:1 v/v) solvent mixture (15 mL) was irradiated at 365 nm (120W lamp) for 10 h. The solvents were removed under reduced pressure and the residue was dissolved in dichloromethane. Hexane was added and the precipitated tetrakis(ester) (*E,E*)-**14** (0.025 g) was filtered-off. The filtrate was evaporated under reduced pressure and the residue was subjected to column chromatography (silica, gradient from dichloromethane/benzene 50:150 to dichloromethane/benzene/methanol

50:150:3) to obtain pure compounds (*E,Z*)-**14**, (*Z,Z*)-**14** and a mixed fraction. Compound (*E,Z*)-**14**: Yield 0.010 g (8%, white solid). M.p. >300 °C. <sup>1</sup>H NMR (400 MHz, CDCl<sub>3</sub>): δ = 7.83–7.77 (m, 4H; ArH<sub>stil</sub>), 7.57–7.52 (m, 4H; ArH<sub>stil</sub>), 7.25–7.20 (m, 4H; ArH<sub>stil</sub>), 7.15–7.10 (m, 4H; ArH<sub>stil</sub>), 7.11 (s, 2H; CH<sub>stil,trans</sub>), 6.88 (d, 4H, <sup>4</sup>J = 2.5 Hz; ArH<sub>calix</sub>), 6.79 (s, 4H; ArH<sub>calix</sub>), 6.79 (d, 4H, <sup>4</sup>J = 2.5 Hz; ArH<sub>calix</sub>), 6.63 (s, 4H; ArH<sub>calix</sub>), 6.53 (s, 2H; CH<sub>stil,cis</sub>), 4.80 (s, 4H; OCH<sub>2</sub>Ar), 4.79 (d, 4H, <sup>2</sup>J = 12.8 Hz; ArCH<sub>2</sub>Ar), 4.74 (s, 4H; OCH<sub>2</sub>Ar), 4.40 (s, 8H; OCH<sub>2</sub>CO), 4.38 (d, 4H, <sup>2</sup>J = 12.8 Hz; ArCH<sub>2</sub>Ar), 3.99 (dq, 4H, <sup>2</sup>J = 10.7 Hz, <sup>3</sup>J = 7.1 Hz; OCH<sub>2</sub>CH<sub>3</sub>), 3.92 (dq, 4H, <sup>2</sup>J = 10.7 Hz, <sup>3</sup>J = 7.1 Hz; OCH<sub>2</sub>CH<sub>3</sub>), 3.28 (d, 4H, <sup>2</sup>J = 12.8 Hz; ArCH<sub>2</sub>Ar), 3.02 (d, 4H, <sup>2</sup>J = 12.8 Hz; ArCH<sub>2</sub>Ar), 1.11 (t, 12H, <sup>3</sup>J = 7.2 Hz; OCH<sub>2</sub>CH<sub>3</sub>), 1.10 (s, 36H; C(CH<sub>3</sub>)<sub>3</sub>), 1.06 (s, 18H; C(CH<sub>3</sub>)<sub>3</sub>), 0.98 (s, 18H; C(CH<sub>3</sub>)<sub>3</sub>) ppm; <sup>13</sup>C NMR (100 MHz, CDCl<sub>3</sub>): δ = 170.44 (C=O), 153.27, 152.77, 145.01, 144.90, 144.70, 138.03, 137.48, 136.68, 136.27, 133.88, 133.76, 133.52, 133.48 (C<sub>Ar</sub>), 129.78, 129.73, 129.73, 129.29, 128.36, 128.30, 126.26, 125.47, 125.24, 125.14, 124.93 (CH<sub>Ar</sub>, CH), 72.03 (OCH<sub>2</sub>Ar), 70.42 (OCH<sub>2</sub>CO), 68.14 (OCH<sub>2</sub>Ar), 60.15 (OCH<sub>2</sub>CH<sub>3</sub>), 33.85, 33.83, 33.72 (C(CH<sub>3</sub>)<sub>3</sub>), 31.83 (ArCH<sub>2</sub>Ar), 31.42, 31.36, 31.33 (C(CH<sub>3</sub>)<sub>3</sub>), 29.69 (ArCH<sub>2</sub>Ar), 14.15 (OCH<sub>2</sub>CH<sub>3</sub>) ppm. Compound (*Z,Z*)-**14**: Yield 0.045 g (37%, white solid). M.p. >300 °C. <sup>1</sup>H NMR (400 MHz, CDCl<sub>3</sub>): δ = 7.17–7.11 (m, 8H; ArH<sub>stil</sub>), 7.00 (s, 8H; ArH<sub>calix</sub>), 6.62 (s, 4H; CH<sub>stil,cis</sub>), 6.38 (s, 8H; ArH<sub>calix</sub>), 5.38 (s, 8H; OCH<sub>2</sub>Ar), 4.20 (d, 8H, <sup>2</sup>J = 12.8 Hz; ArCH<sub>2</sub>Ar), 4.02 (s, 8H; OCH<sub>2</sub>CO), 3.95 (q, 8H, <sup>3</sup>J = 7.2 Hz; OCH<sub>2</sub>CH<sub>3</sub>), 2.93 (d, 8H, <sup>2</sup>J = 12.8 Hz; ArCH<sub>2</sub>Ar), 1.29 (s, 36H; C(CH<sub>3</sub>)<sub>3</sub>), 1.12 (t, 12H, <sup>3</sup>J = 7.2 Hz; OCH<sub>2</sub>CH<sub>3</sub>), 0.80 (s, 36H; C(CH<sub>3</sub>)<sub>3</sub>) ppm; <sup>13</sup>C NMR (100 MHz, CDCl<sub>3</sub>): δ = 169.92 (C=O), 153.74, 152.83, 144.70, 144.55, 138.04, 136.30, 135.44, 131.66 (C<sub>Ar</sub>), 130.43, 130.08, 128.45, 125.56, 124.62 (CH<sub>Ar</sub>), 76.56 (OCH<sub>2</sub>Ar), 71.53 (OCH<sub>2</sub>CO), 60.63 (OCH<sub>2</sub>CH<sub>3</sub>), 34.01, 33.54 (C(CH<sub>3</sub>)<sub>3</sub>), 31.80 (ArCH<sub>2</sub>Ar), 31.69, 31.08 (C(CH<sub>3</sub>)<sub>3</sub>), 14.11 (OCH<sub>2</sub>CH<sub>3</sub>) ppm.

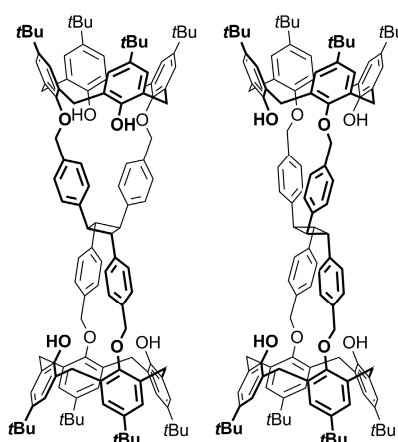

*Biscalixarene cyclobutanes 25 and 26.* A stirred solution of bis(calix[4]arene) (*E,E*)-**11** (0.511 g, 0.30 mmol) in dichloromethane (20 mL) was irradiated at 365 nm (120W lamp) for 2 h. The solvents were removed under reduced pressure and the residue was subjected to column chromatography (silica, gradient from hexane/dichloromethane 3:1 to hexane/dichloromethane 1:2) to obtain pure compounds **25**, **26** and a mixed fraction in total yield of 0.419 g (82%). Compound **25**: Yield 0.192 g (38%, white solid). M.p.

>300 °C. <sup>1</sup>H NMR (400 MHz, CDCl<sub>3</sub>): δ = 7.75–7.70 (m, 8H; ArH<sub>cb</sub>), 7.66 (s, 4H; OH), 7.37–7.32 (m, 8H; ArH<sub>cb</sub>), 7.07 (s, 8H; ArH<sub>calix</sub>), 6.91 (s, 8H; ArH<sub>calix</sub>), 4.92 (s, 8H; OCH<sub>2</sub>Ar), 4.44 (d,

8H,  $^2J = 12.8$  Hz; ArCH<sub>2</sub>Ar), 4.30 (s, 4H; CH), 3.40 (d, 8H,  $^2J = 12.8$  Hz; ArCH<sub>2</sub>Ar), 1.29 (s, 36H; C(CH<sub>3</sub>)<sub>3</sub>), 1.02 (s, 36H; C(CH<sub>3</sub>)<sub>3</sub>) ppm; <sup>13</sup>C NMR (100 MHz, CDCl<sub>3</sub>):  $\delta = 150.96, 149.23, 147.13, 143.91, 141.27, 134.19, 132.95$  (C<sub>Ar</sub>), 128.55, 127.36 (CH<sub>Ar</sub>), 127.33 (C<sub>Ar</sub>), 125.55, 125.12 (CH<sub>Ar</sub>), 78.11 (OCH<sub>2</sub>Ar), 49.43 (CH), 34.04, 33.79 (C(CH<sub>3</sub>)<sub>3</sub>), 31.86 (ArCH<sub>2</sub>Ar), 31.71, 31.05 (C(CH<sub>3</sub>)<sub>3</sub>) ppm. ESI-MS  $m/z$ : 1707.0371 [M+H]<sup>+</sup> for C<sub>120</sub>H<sub>137</sub>O<sub>8</sub> (1707.0342). Compound **26**: Yield 0.086 g (17%, white solid). M.p. 259–261 °C. <sup>1</sup>H NMR (400 MHz, CDCl<sub>3</sub>):  $\delta = 7.81$  (s, 2H; OH), 7.80 (s, 2H; OH), 7.56–7.51 (m, 8H; ArH<sub>cb</sub>), 7.19–7.14 (m, 8H; ArH<sub>cb</sub>), 7.05 (s, 4H; ArH<sub>calix</sub>), 7.04 (s, 4H; ArH<sub>calix</sub>), 6.96 (bs, 8H; ArH<sub>calix</sub>), 4.75 (s, 8H; OCH<sub>2</sub>Ar), 4.64 (s, 4H; CH), 4.44 (d, 4H,  $^2J = 12.7$  Hz; ArCH<sub>2</sub>Ar), 4.43 (d, 4H,  $^2J = 12.7$  Hz; ArCH<sub>2</sub>Ar), 3.40 (d, 8H,  $^2J = 12.7$  Hz; ArCH<sub>2</sub>Ar), 1.26 (s, 18H; C(CH<sub>3</sub>)<sub>3</sub>), 1.26 (s, 18H; C(CH<sub>3</sub>)<sub>3</sub>), 1.08 (s, 36H; C(CH<sub>3</sub>)<sub>3</sub>) ppm; <sup>13</sup>C NMR (100 MHz, CDCl<sub>3</sub>):  $\delta = 151.04, 151.00, 149.34, 147.13, 141.28, 140.84, 133.85, 133.19, 133.13$  (C<sub>Ar</sub>), 129.31, 128.32 (CH<sub>Ar</sub>), 127.29, 127.26 (C<sub>Ar</sub>), 125.64, 125.64, 125.21, 125.17 (CH<sub>Ar</sub>), 78.54 (OCH<sub>2</sub>Ar), 46.89 (CH<sub>cb</sub>), 34.11, 33.77 (C(CH<sub>3</sub>)<sub>3</sub>), 32.19, 32.16 (ArCH<sub>2</sub>Ar), 31.69, 31.13 (C(CH<sub>3</sub>)<sub>3</sub>) ppm. ESI-MS  $m/z$ : 1707.0343 [M+H]<sup>+</sup> for C<sub>120</sub>H<sub>137</sub>O<sub>8</sub> (1707.0342).

## NMR spectra of novel compounds

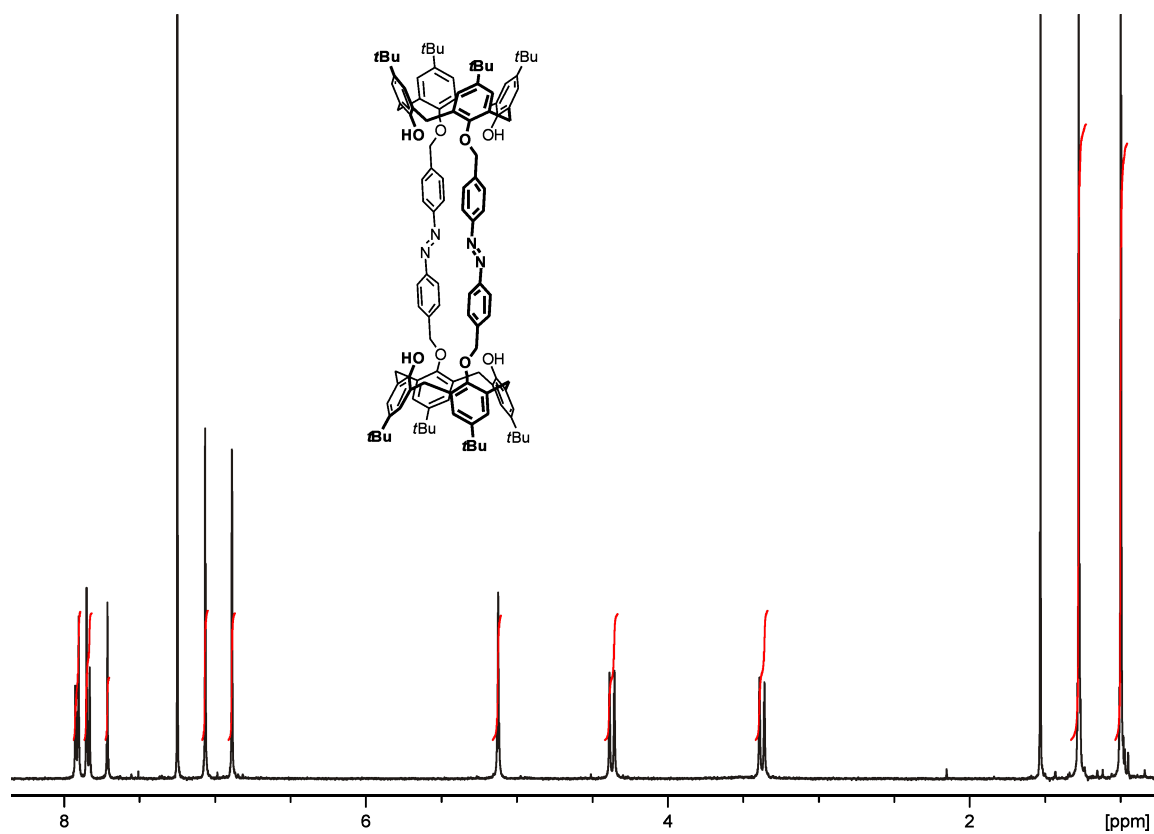

**Figure S1.**  $^1\text{H}$  NMR spectrum of bis(calix[4]arene) (*E,E*)-**9** (400 MHz,  $\text{CDCl}_3$ ).

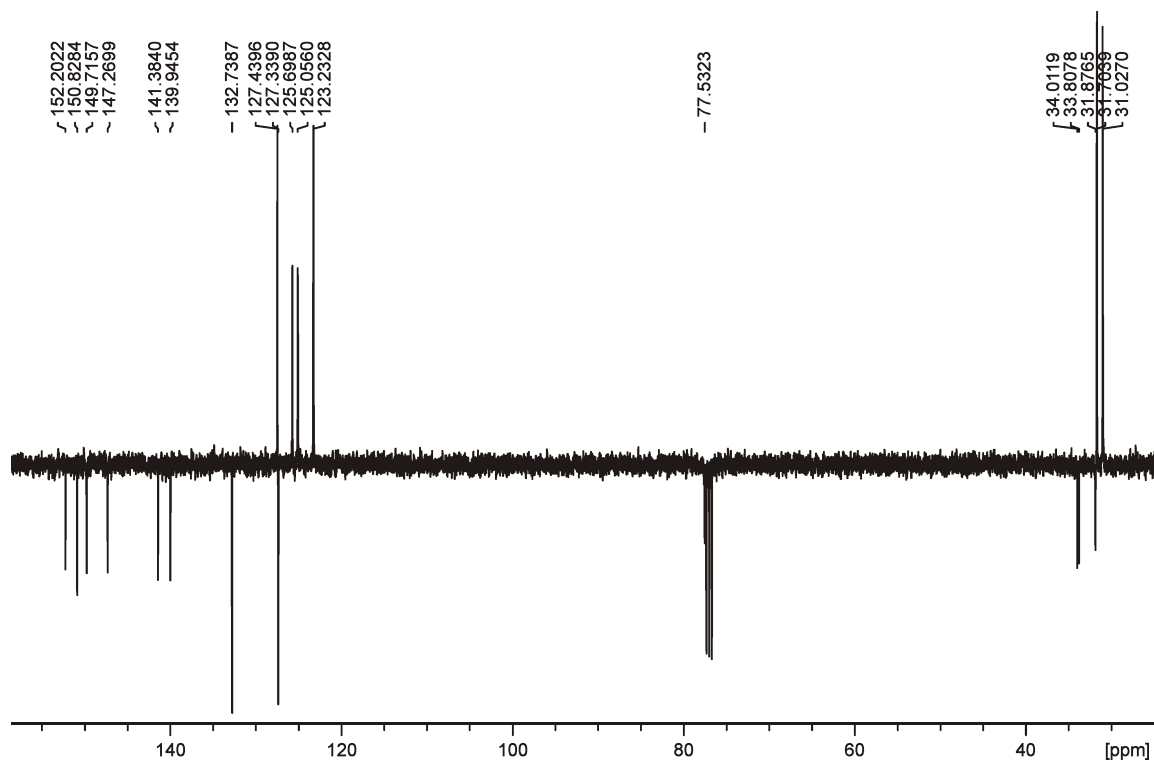

**Figure S2.**  $^{13}\text{C}$  NMR spectrum (APT) of bis(calix[4]arene) (*E,E*)-**9** (100 MHz,  $\text{CDCl}_3$ ).

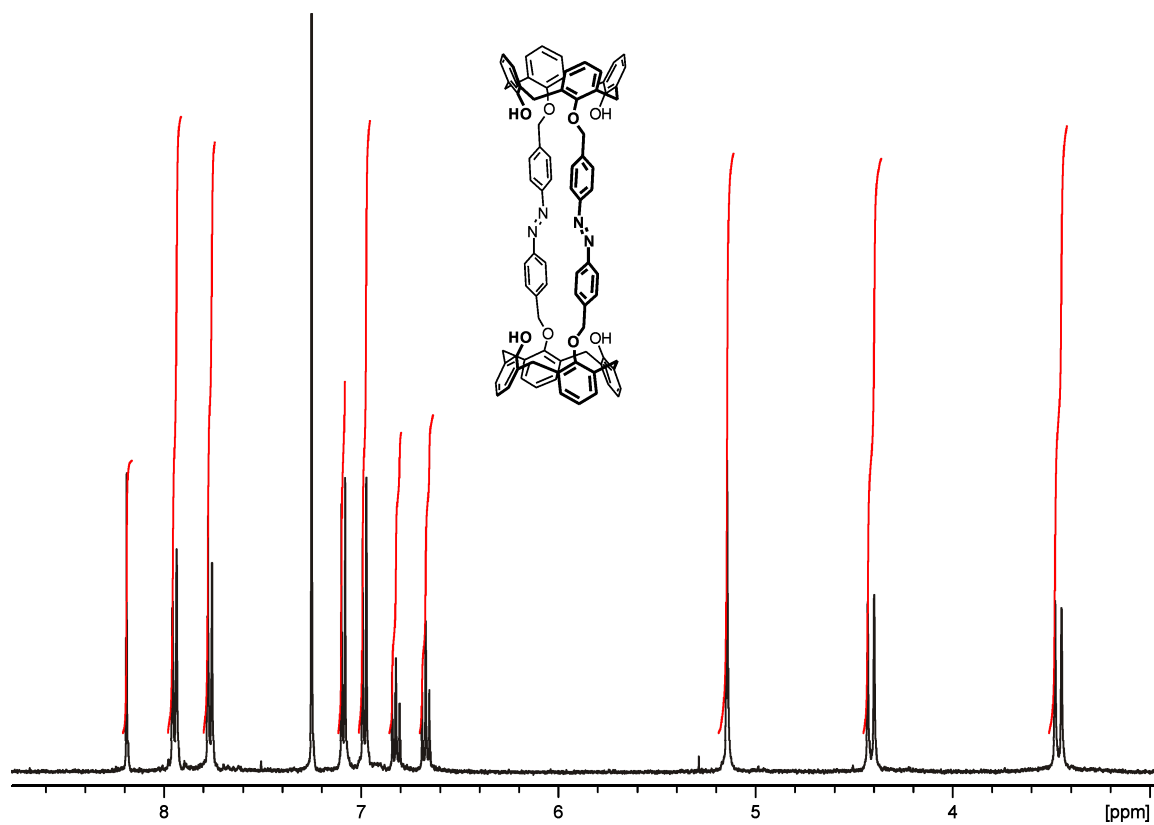

**Figure S3.** <sup>1</sup>H NMR spectrum of bis(calix[4]arene) (*E,E*)-**10** (400 MHz, CDCl<sub>3</sub>).

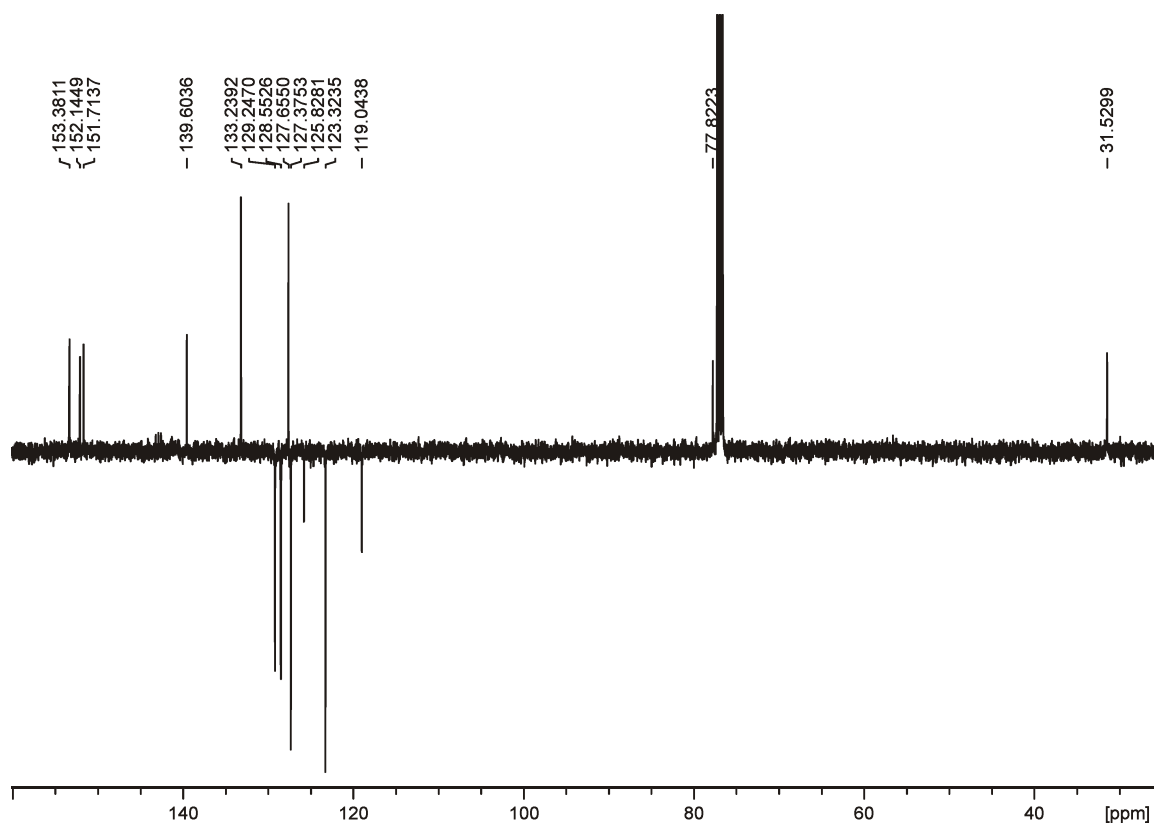

**Figure S4.** <sup>13</sup>C NMR spectrum (APT) of bis(calix[4]arene) (*E,E*)-**10** (100 MHz, CDCl<sub>3</sub>).



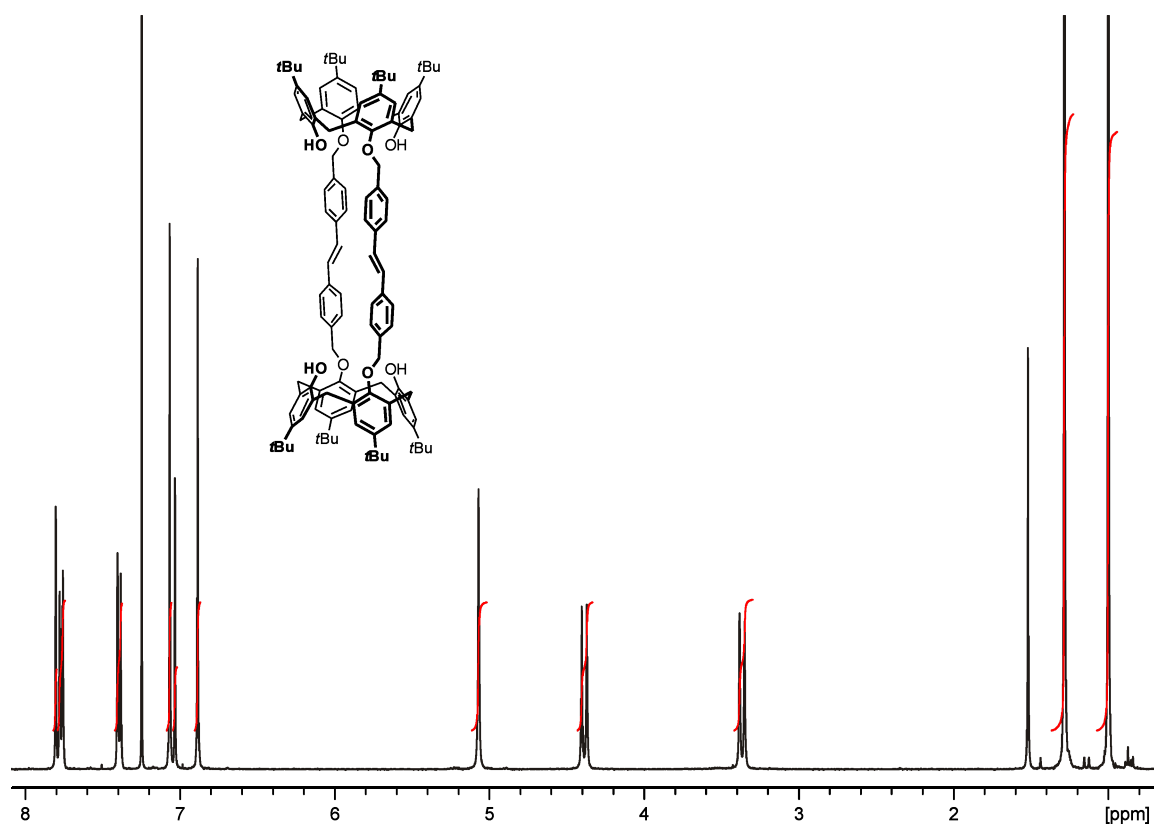

**Figure S5.**  $^1\text{H}$  NMR spectrum of bis(calix[4]arene) (*E,E*)-**11** (400 MHz,  $\text{CDCl}_3$ ).

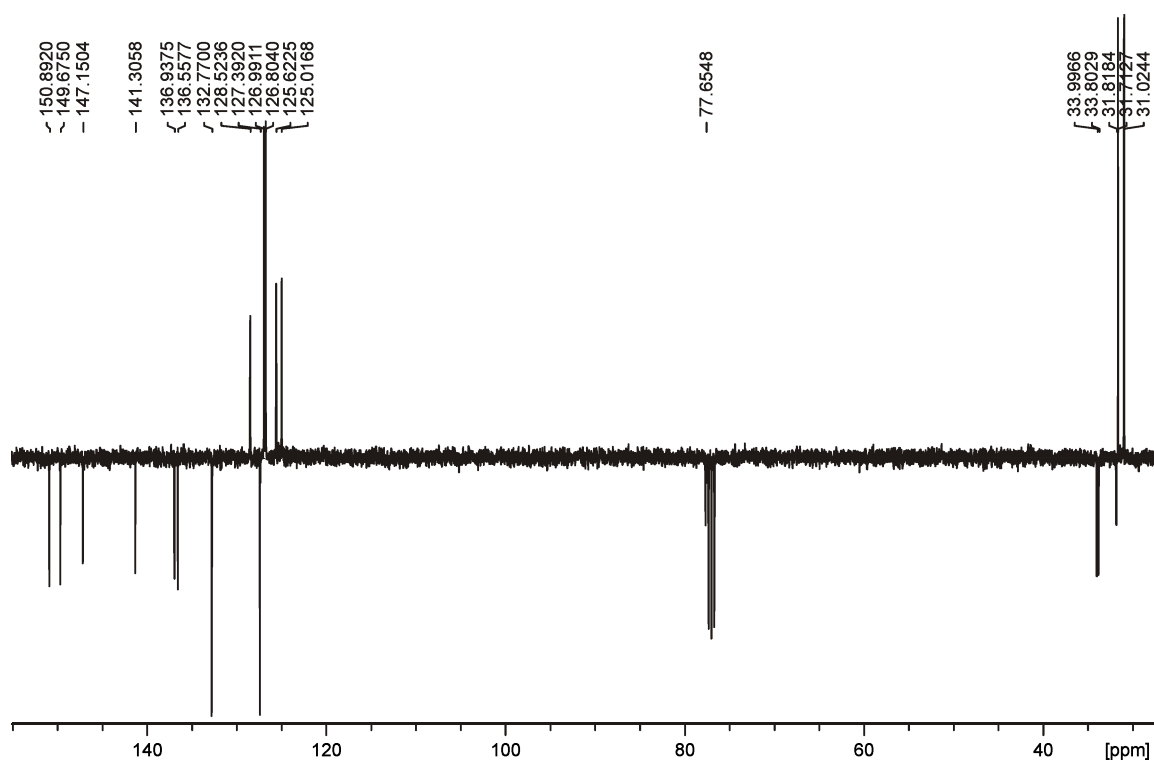

**Figure S6.**  $^{13}\text{C}$  NMR spectrum (APT) of bis(calix[4]arene) (*E,E*)-**11** (100 MHz,  $\text{CDCl}_3$ ).

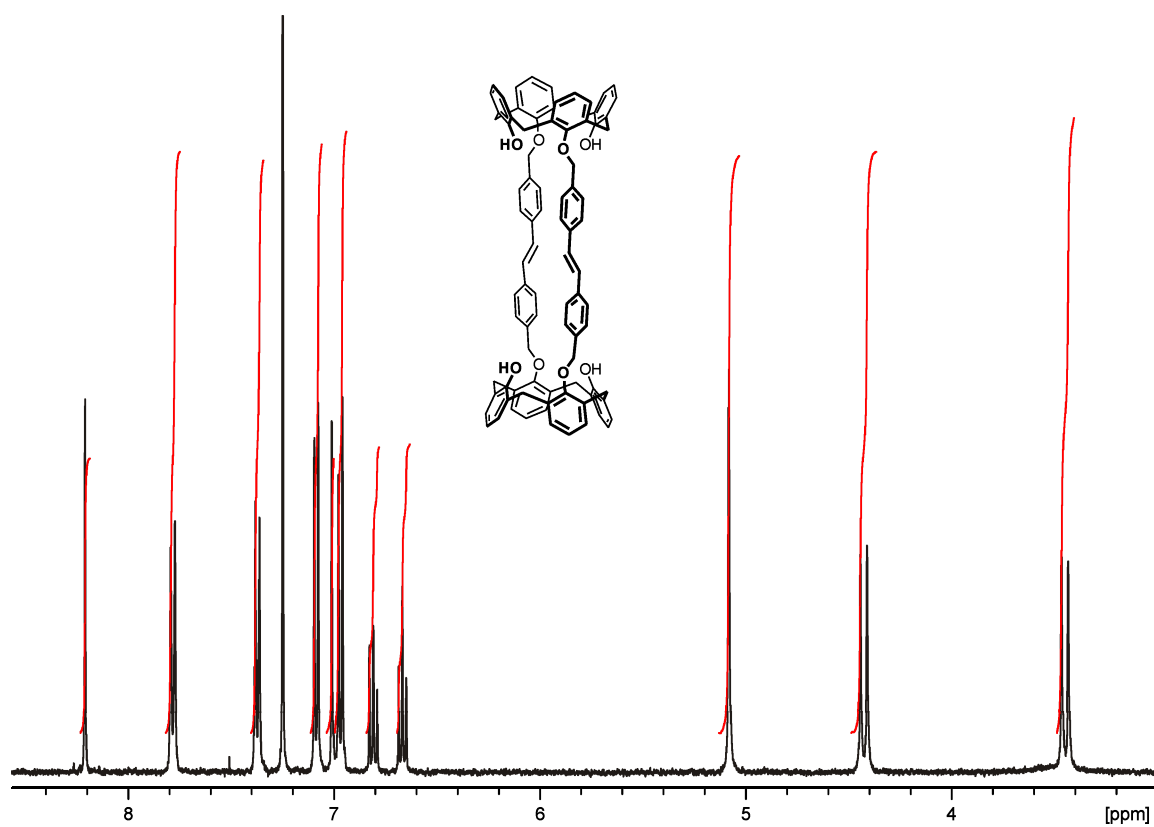

**Figure S7.**  $^1\text{H}$  NMR spectrum of bis(calix[4]arene) (*E,E*)-12 (400 MHz,  $\text{CDCl}_3$ ).

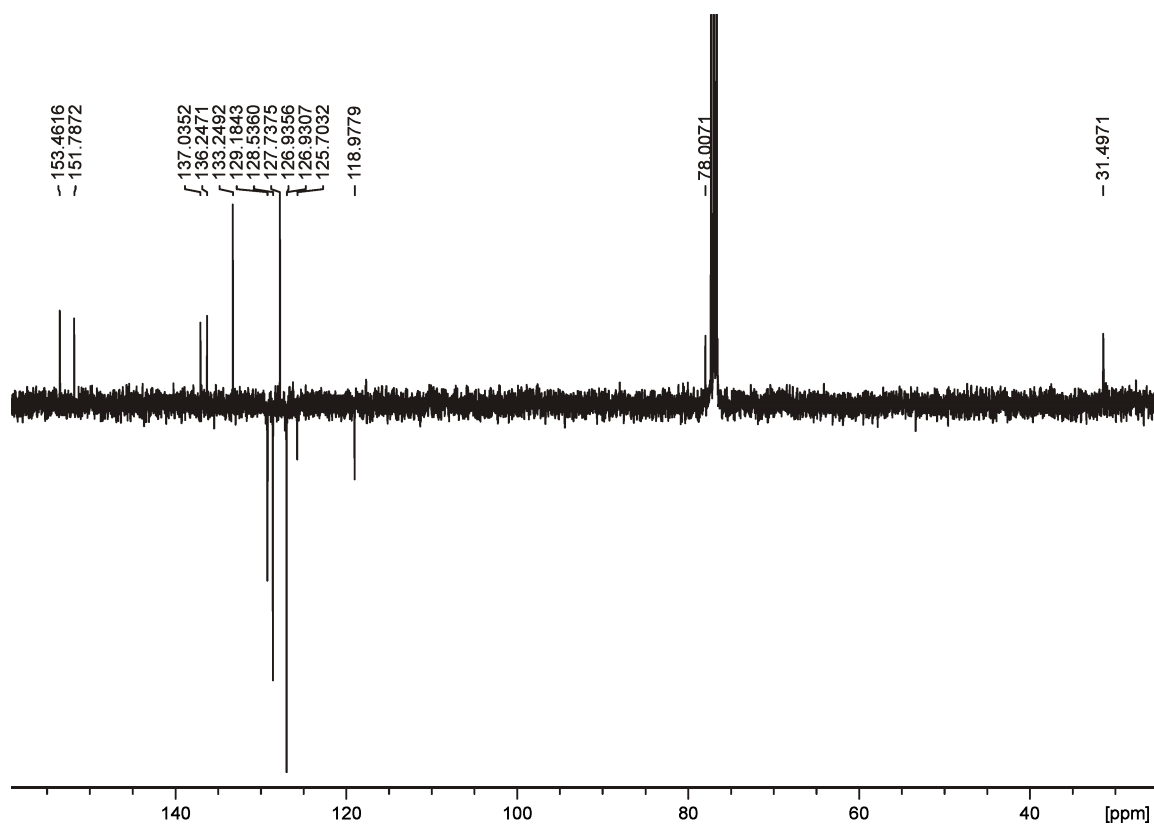

**Figure S8.**  $^{13}\text{C}$  NMR spectrum (APT) of bis(calix[4]arene) (*E,E*)-12 (100 MHz,  $\text{CDCl}_3$ ).

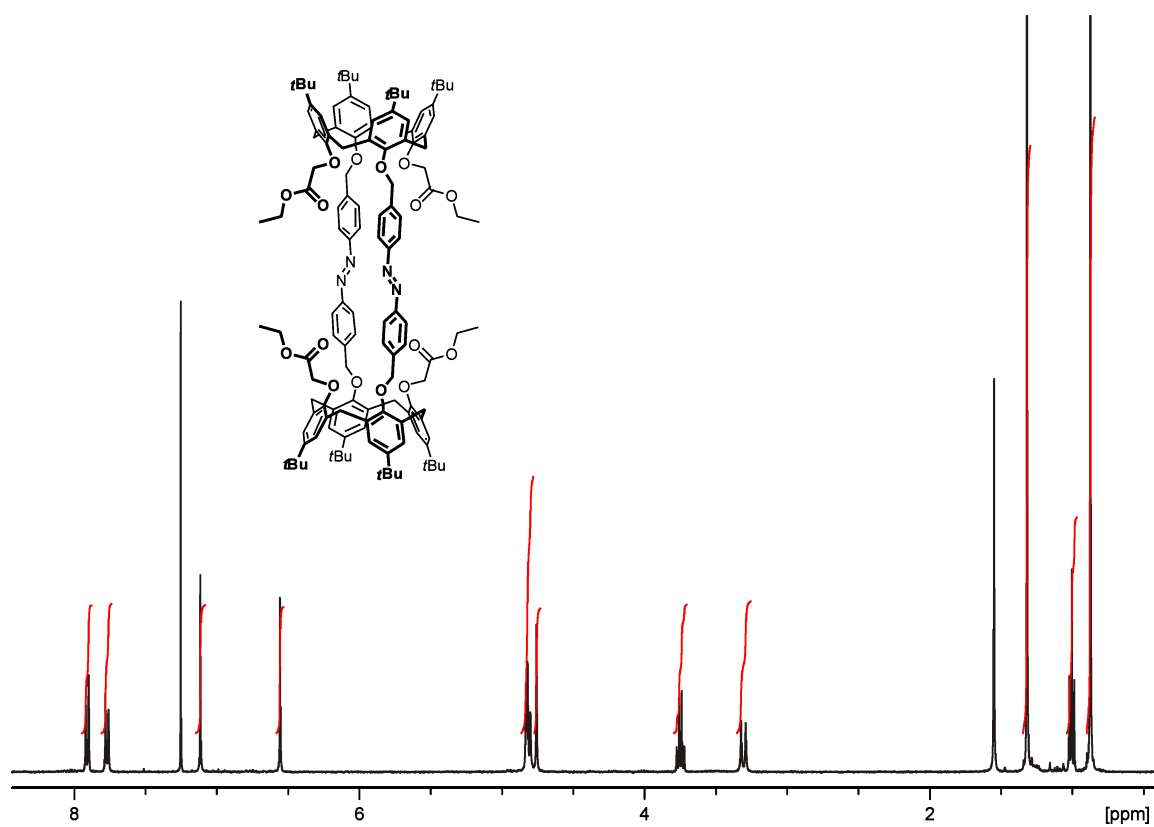

**Figure S9.** <sup>1</sup>H NMR spectrum of bis(calix[4]arene) (*E,E*)-**13** (400 MHz, CDCl<sub>3</sub>).

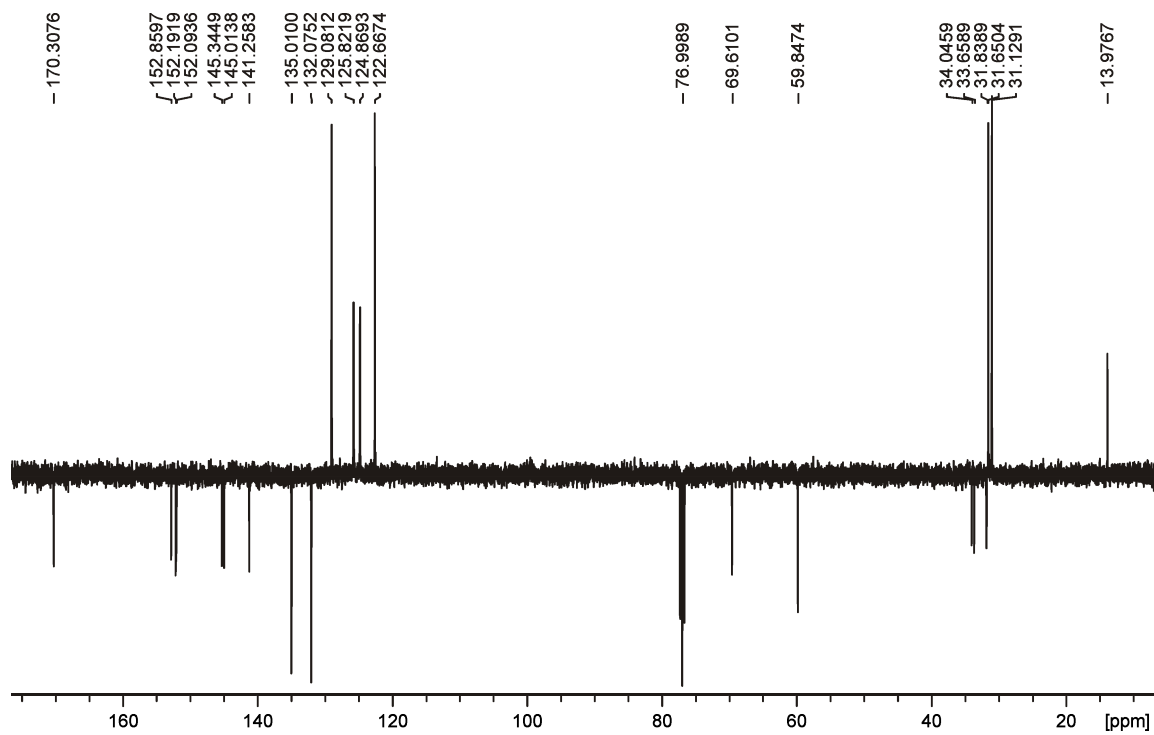

**Figure S10.** <sup>13</sup>C NMR spectrum (APT) of bis(calix[4]arene) (*E,E*)-**13** (100 MHz, CDCl<sub>3</sub>).

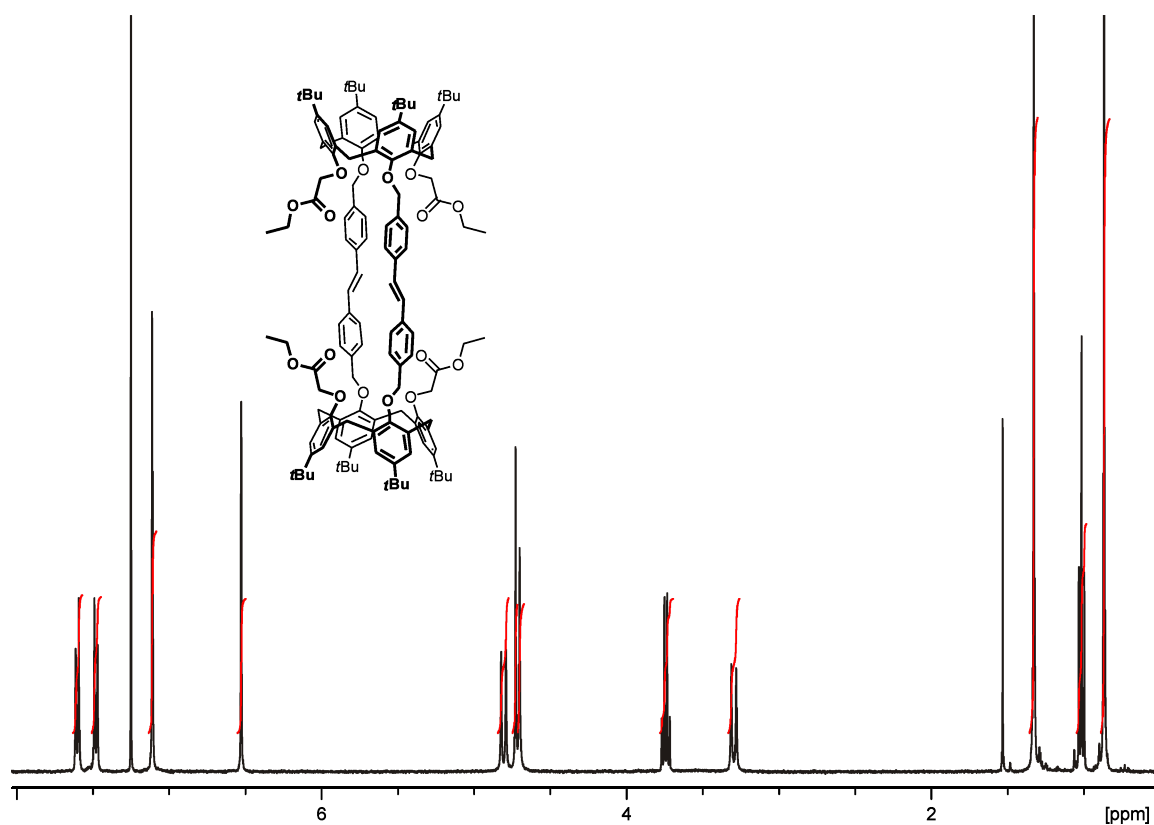

**Figure S11.**  $^1\text{H}$  NMR spectrum of bis(calix[4]arene) (*E,E*)-**14** (400 MHz,  $\text{CDCl}_3$ ).

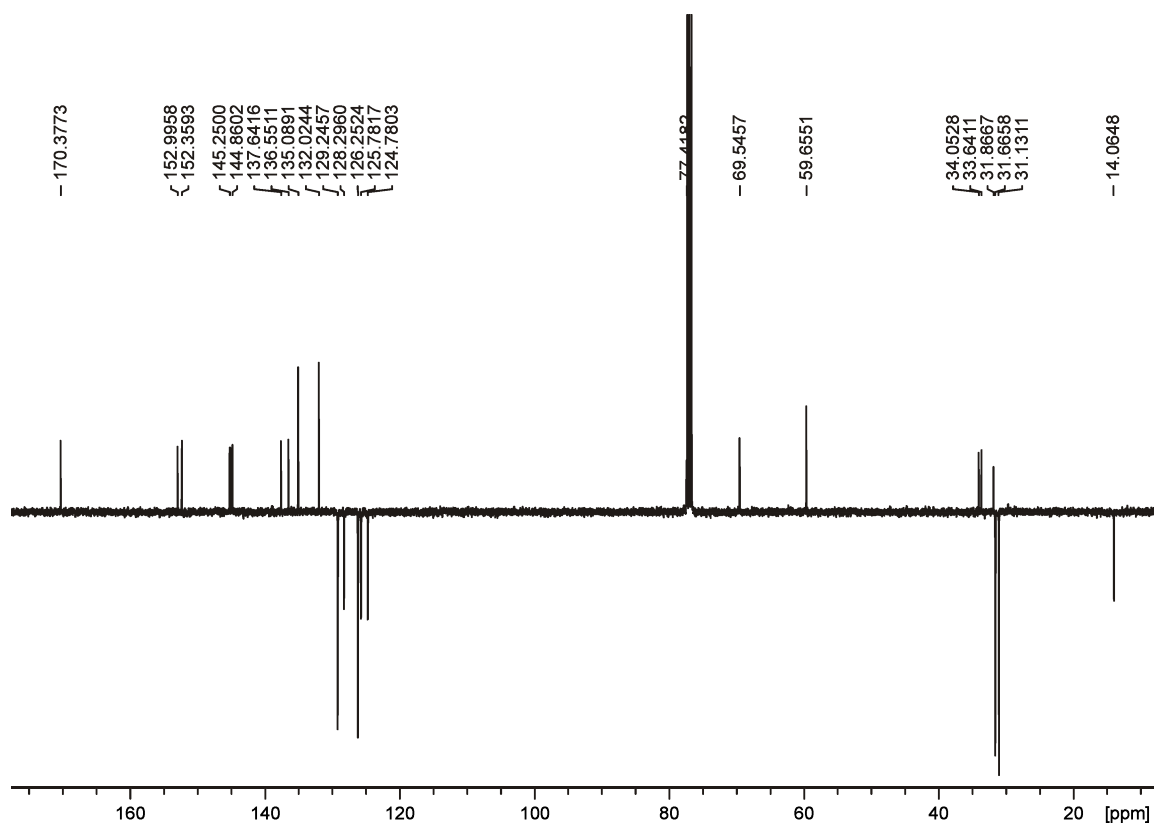

**Figure S12.**  $^{13}\text{C}$  NMR spectrum (APT) of bis(calix[4]arene) (*E,E*)-**14** (100 MHz,  $\text{CDCl}_3$ ).

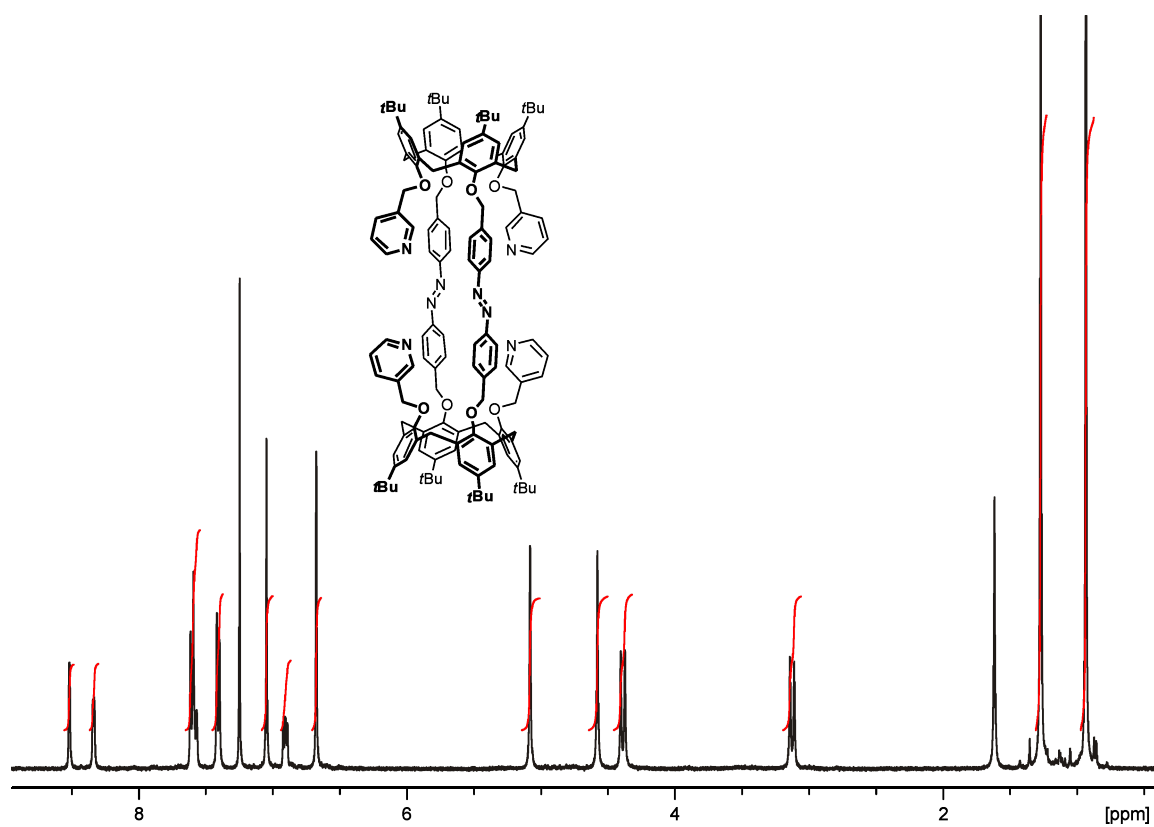

**Figure S13.** <sup>1</sup>H NMR spectrum of bis(calix[4]arene) (*E,E*)-**15** (400 MHz, CDCl<sub>3</sub>).

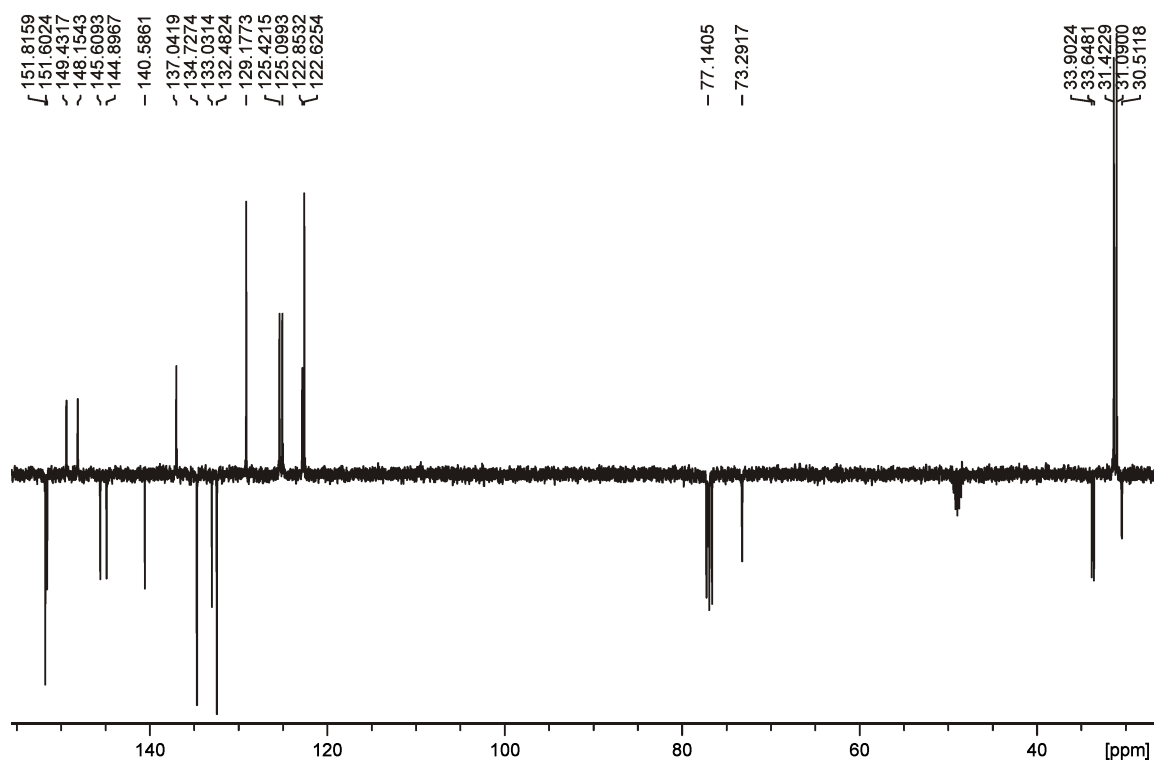

**Figure S14.** <sup>13</sup>C NMR spectrum (APT) of bis(calix[4]arene) (*E,E*)-**15** (100 MHz, CDCl<sub>3</sub>+CD<sub>3</sub>OD).

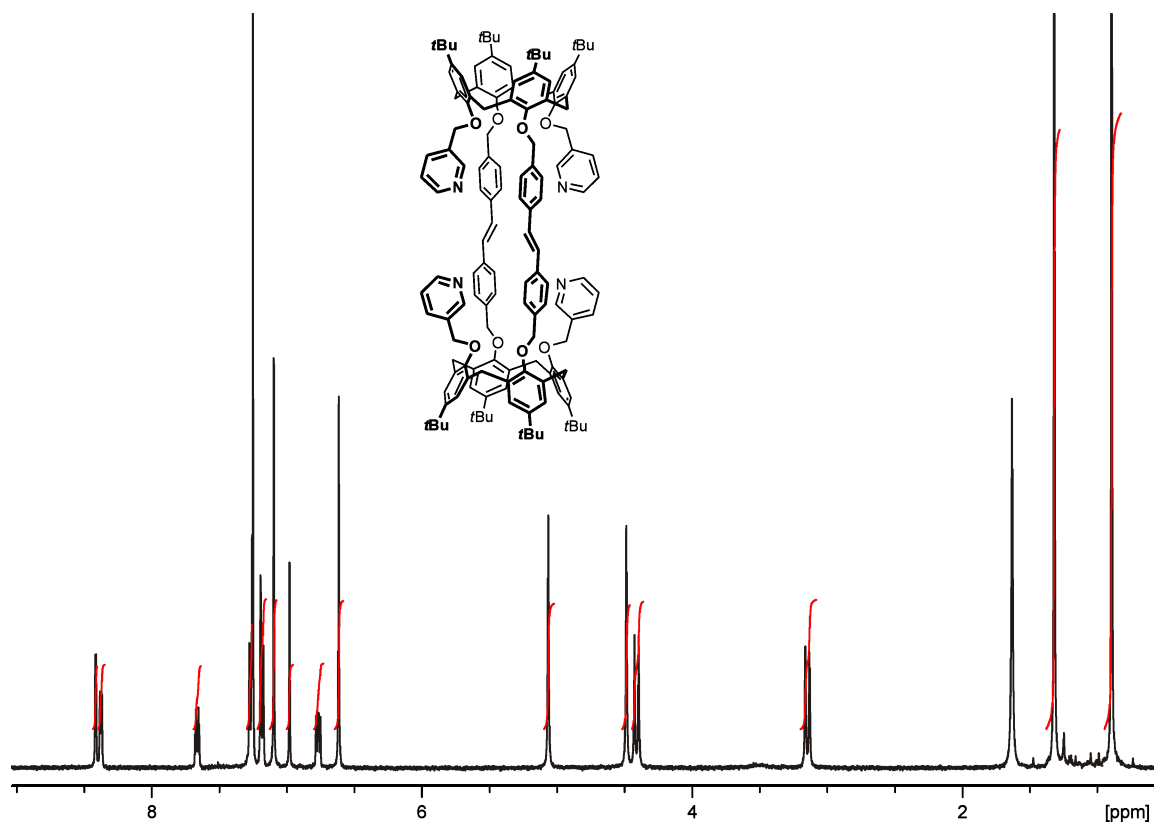

**Figure S15.** <sup>1</sup>H NMR spectrum of bis(calix[4]arene) (*E,E*)-**16** (400 MHz, CDCl<sub>3</sub>).

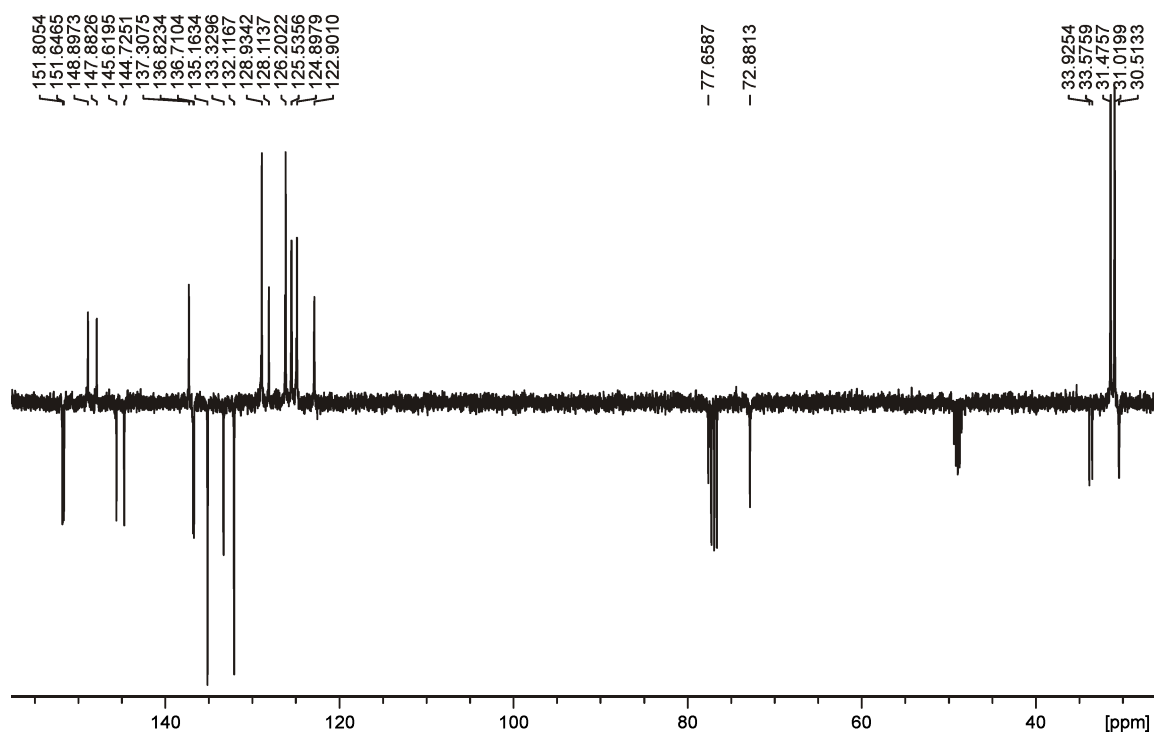

**Figure S16.** <sup>13</sup>C NMR spectrum (APT) of bis(calix[4]arene) (*E,E*)-**16** (100 MHz, CDCl<sub>3</sub>+CD<sub>3</sub>OD).



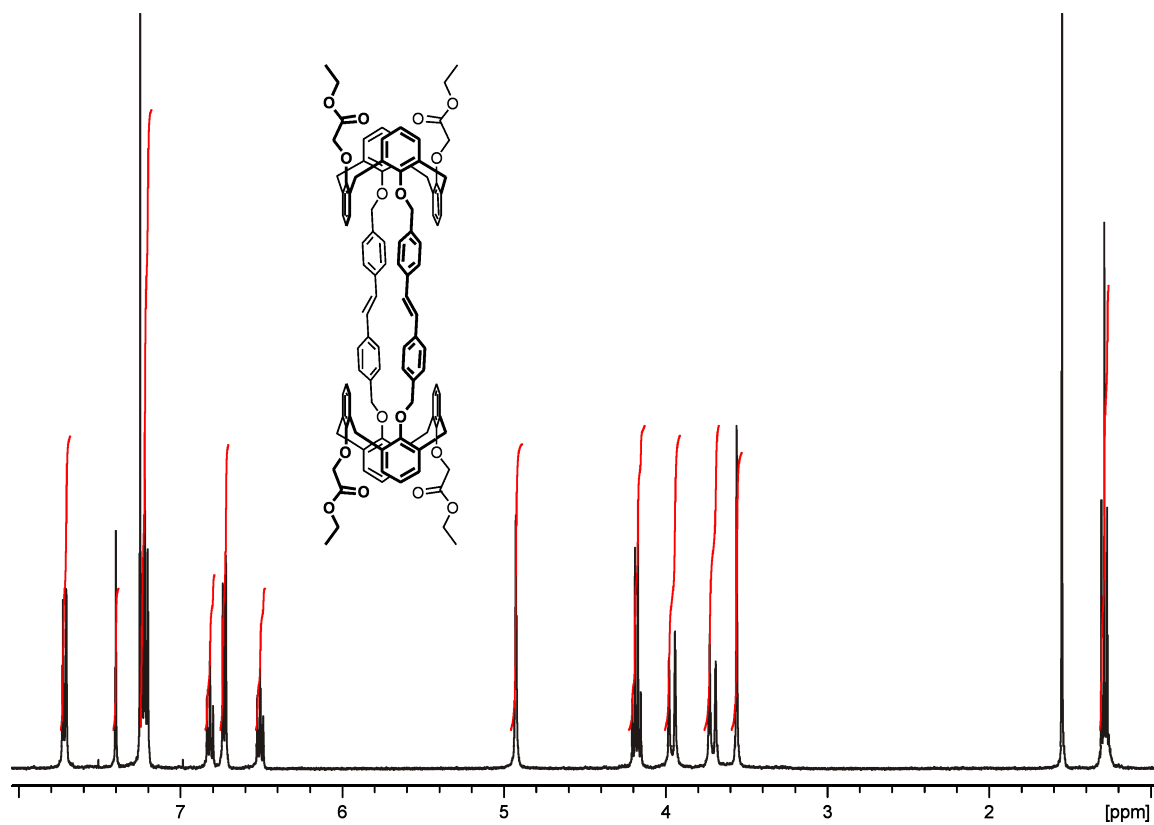

**Figure S17.**  $^1\text{H}$  NMR spectrum of bis(calix[4]arene) (*E,E*)-17 (400 MHz, CDCl<sub>3</sub>).

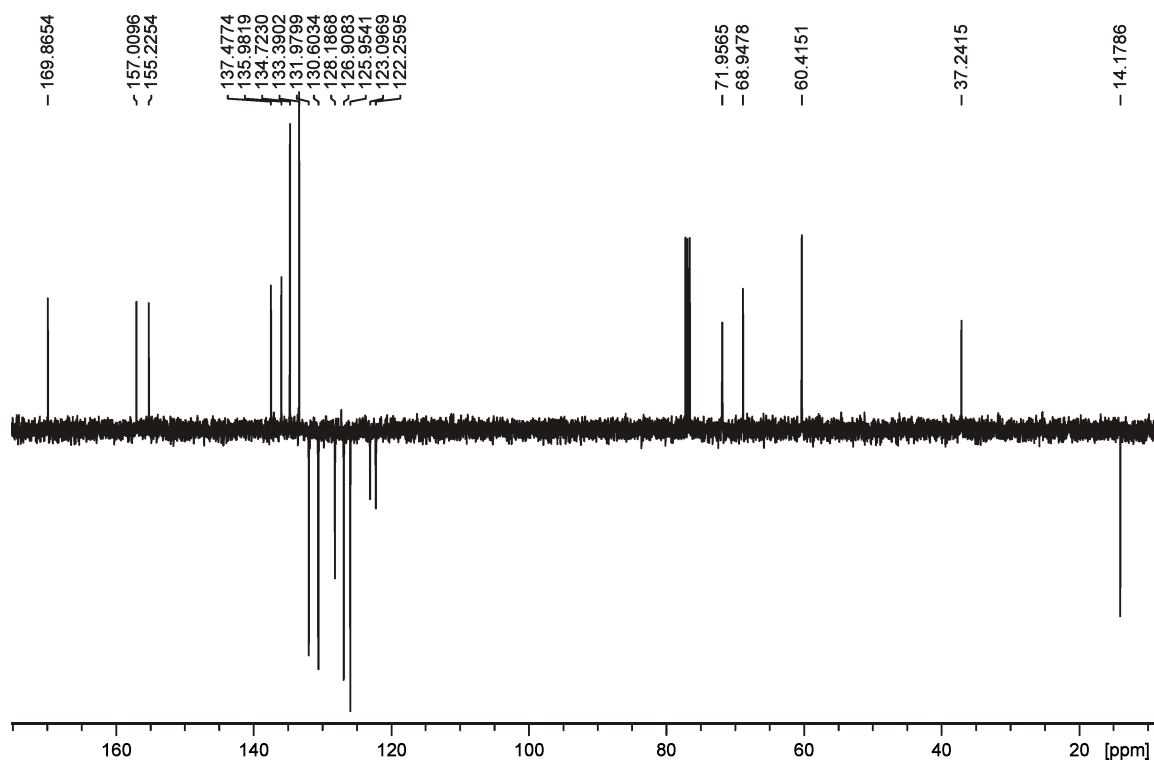

**Figure S18.**  $^{13}\text{C}$  NMR spectrum (APT) of bis(calix[4]arene) (*E,E*)-17 (100 MHz, CDCl<sub>3</sub>).

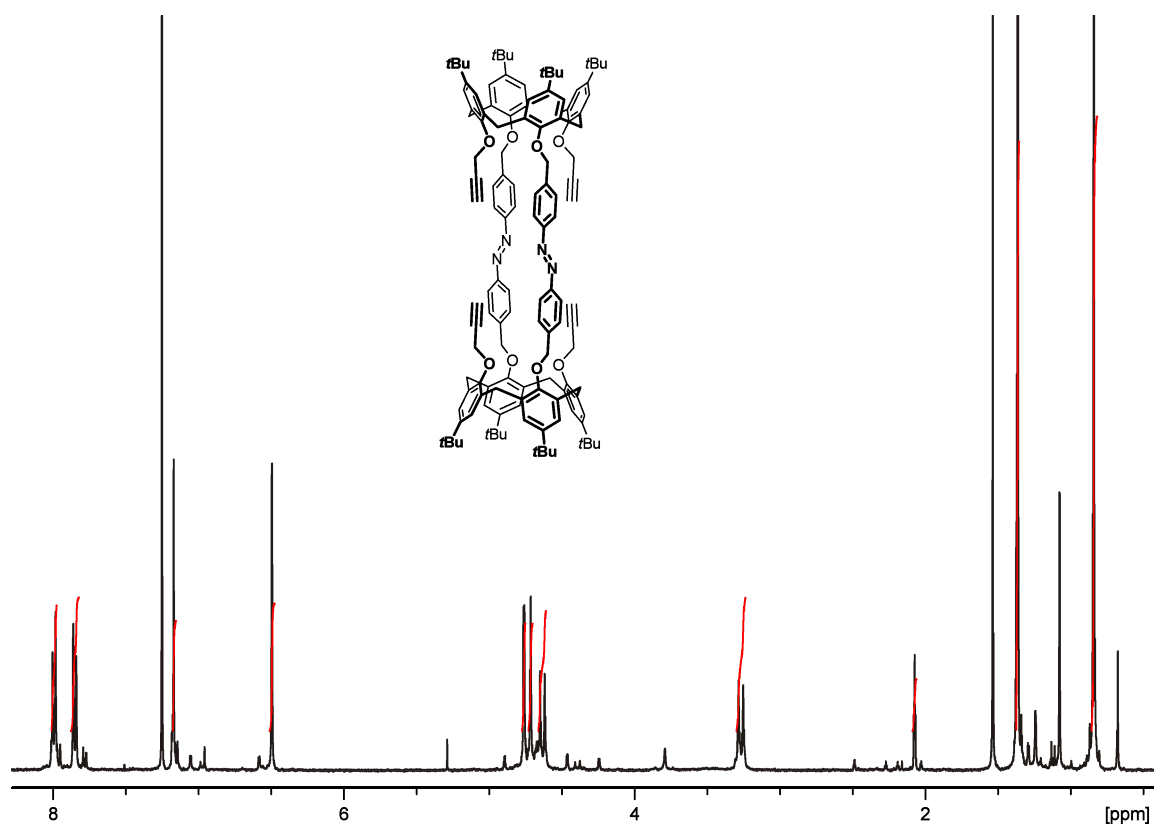

**Figure S19.**  $^1\text{H}$  NMR spectrum of bis(calix[4]arene) (*E,E*)-**18** (400 MHz,  $\text{CDCl}_3$ , contains trace signals from bis(calixarene) (*E,E*)-**19**).

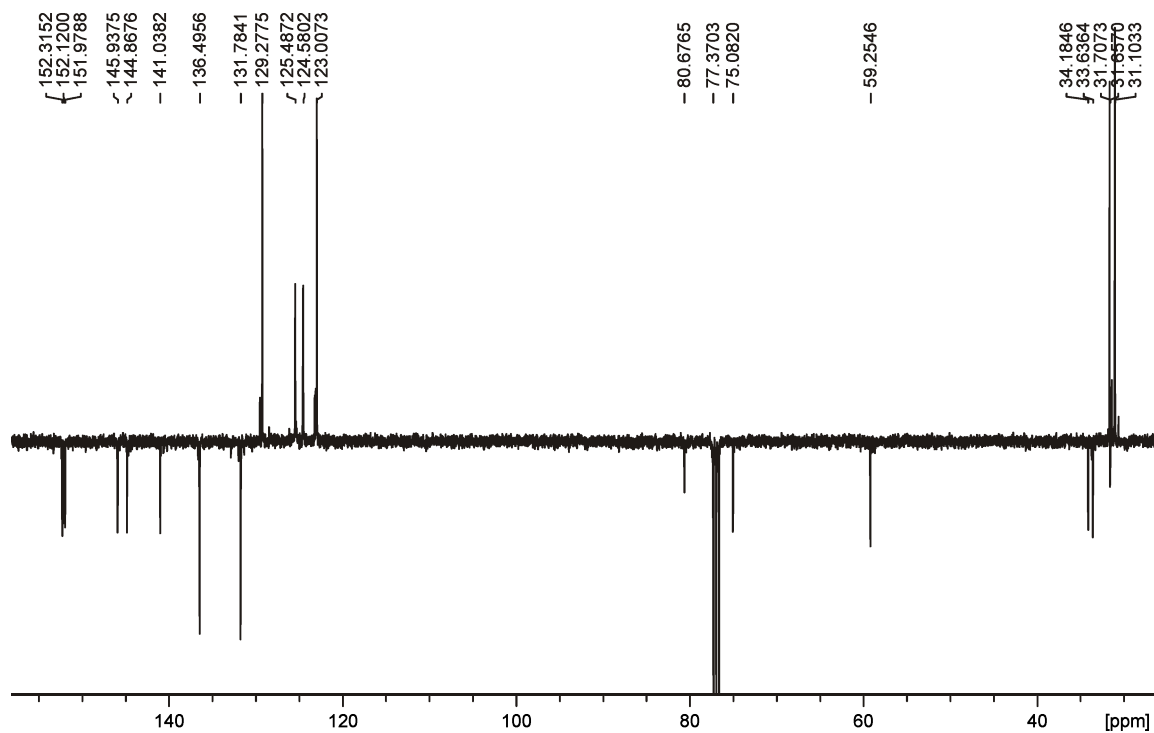

**Figure S20.**  $^{13}\text{C}$  NMR spectrum (APT) of bis(calix[4]arene) (*E,E*)-**18** (100 MHz,  $\text{CDCl}_3$ , contains trace signals from bis(calixarene) (*E,E*)-**19**).

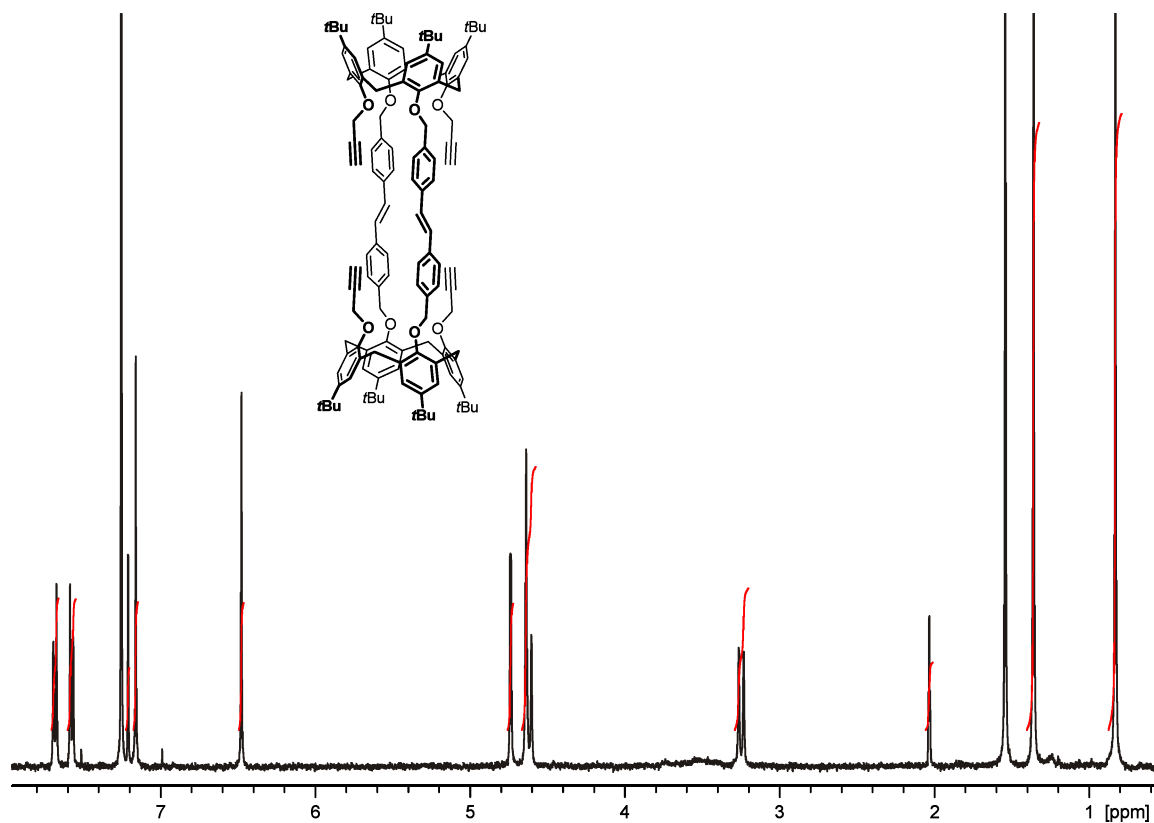

**Figure S21.**  $^1\text{H}$  NMR spectrum of bis(calix[4]arene) (*E,E*)-**20** (400 MHz,  $\text{CDCl}_3$ ).

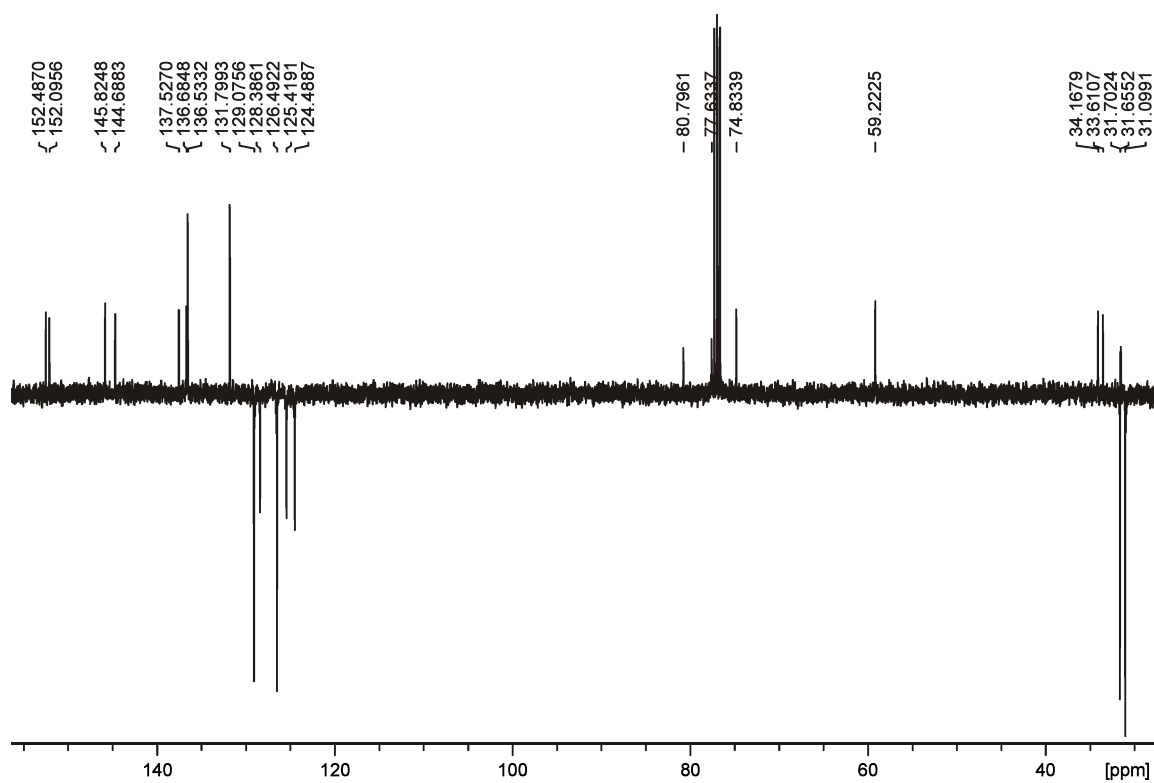

**Figure S22.**  $^{13}\text{C}$  NMR spectrum (APT) of bis(calix[4]arene) (*E,E*)-**20** (100 MHz,  $\text{CDCl}_3$ ).

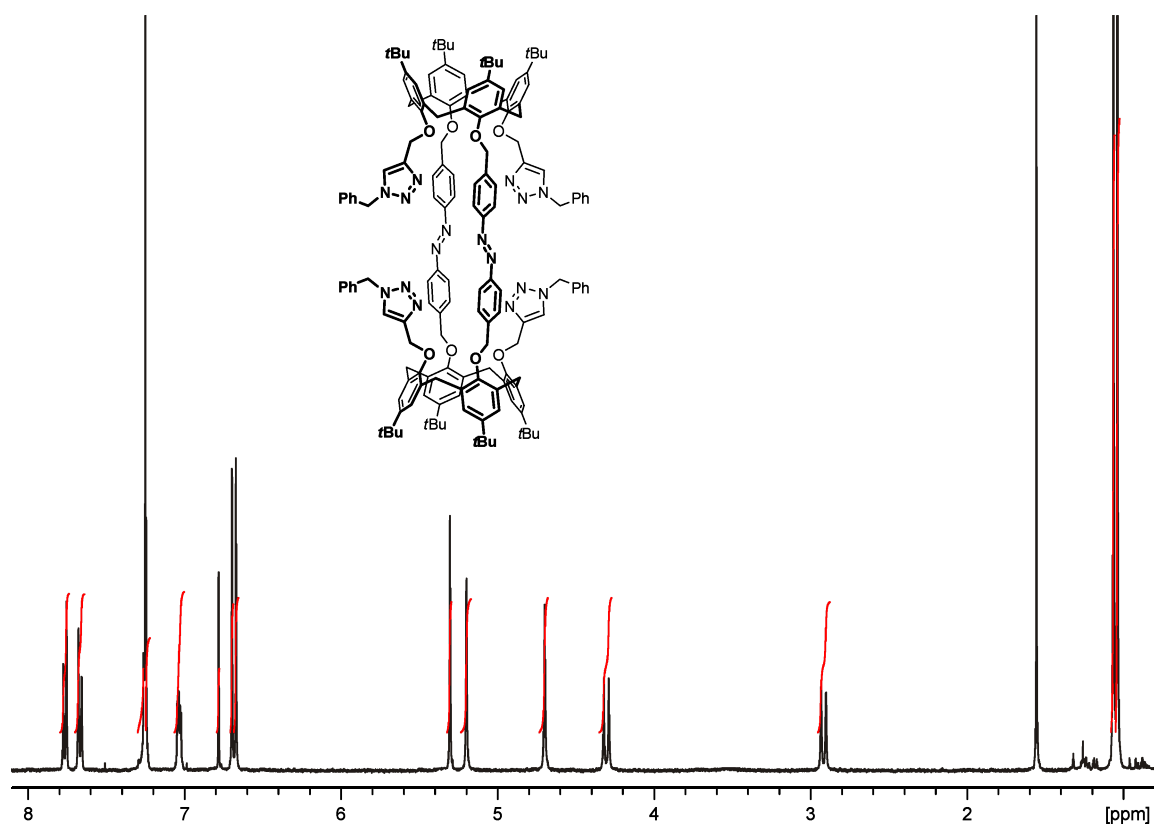

**Figure S23.**  $^1\text{H}$  NMR spectrum of bis(calix[4]arene) (*E,E*)-**22** (400 MHz,  $\text{CDCl}_3$ ).

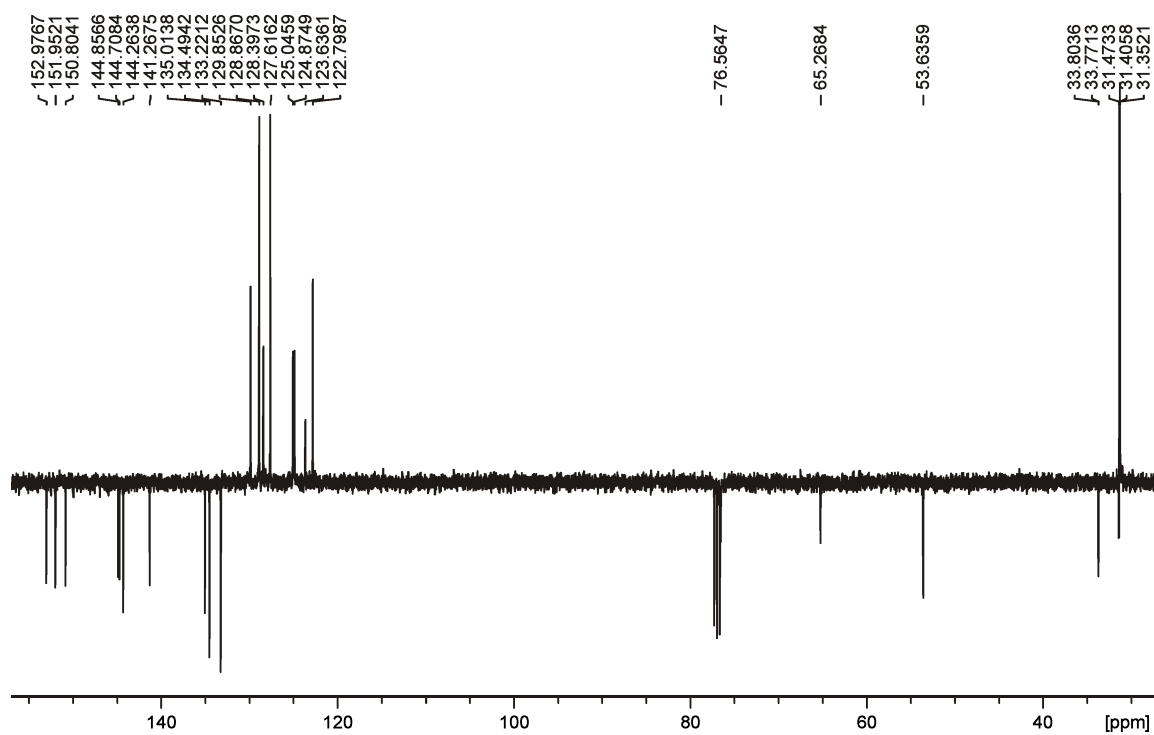

**Figure S24.**  $^{13}\text{C}$  NMR spectrum (APT) of bis(calix[4]arene) (*E,E*)-**22** (100 MHz,  $\text{CDCl}_3$ ).

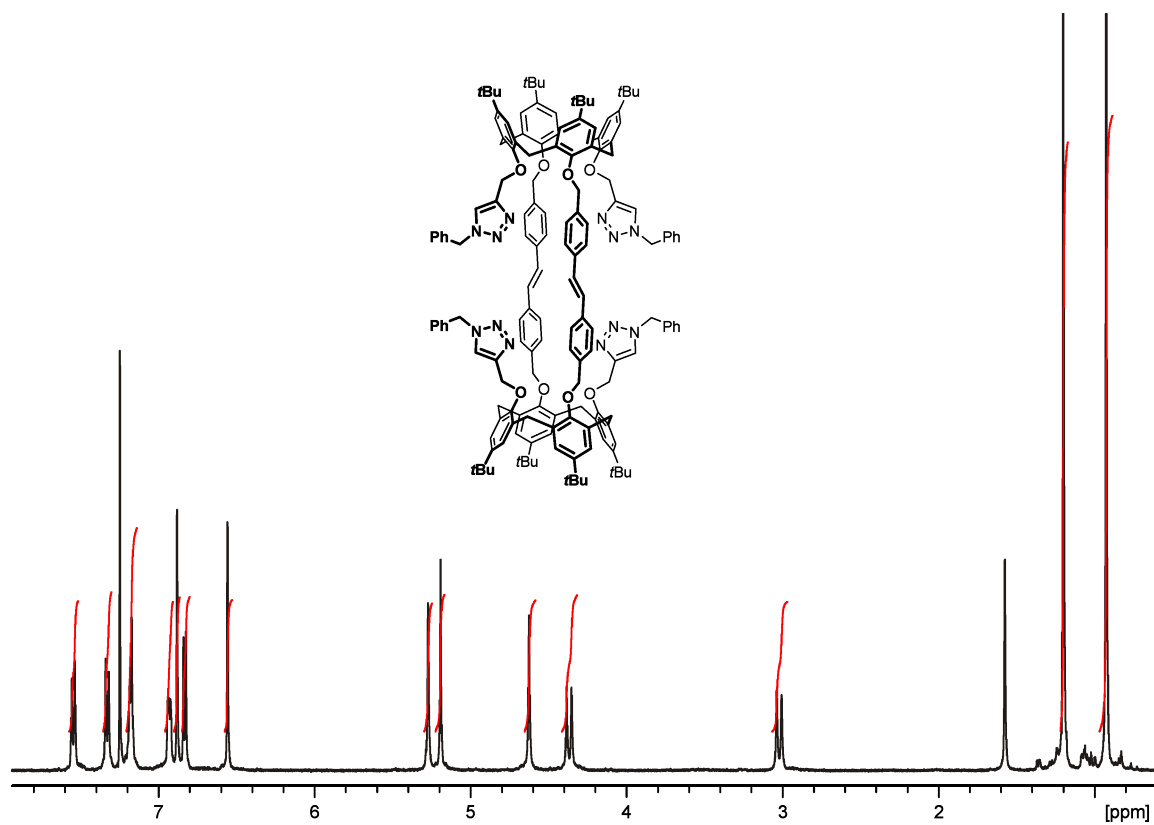

**Figure S25.** <sup>1</sup>H NMR spectrum of bis(calix[4]arene) (*E,E*)-**23** (400 MHz, CDCl<sub>3</sub>).

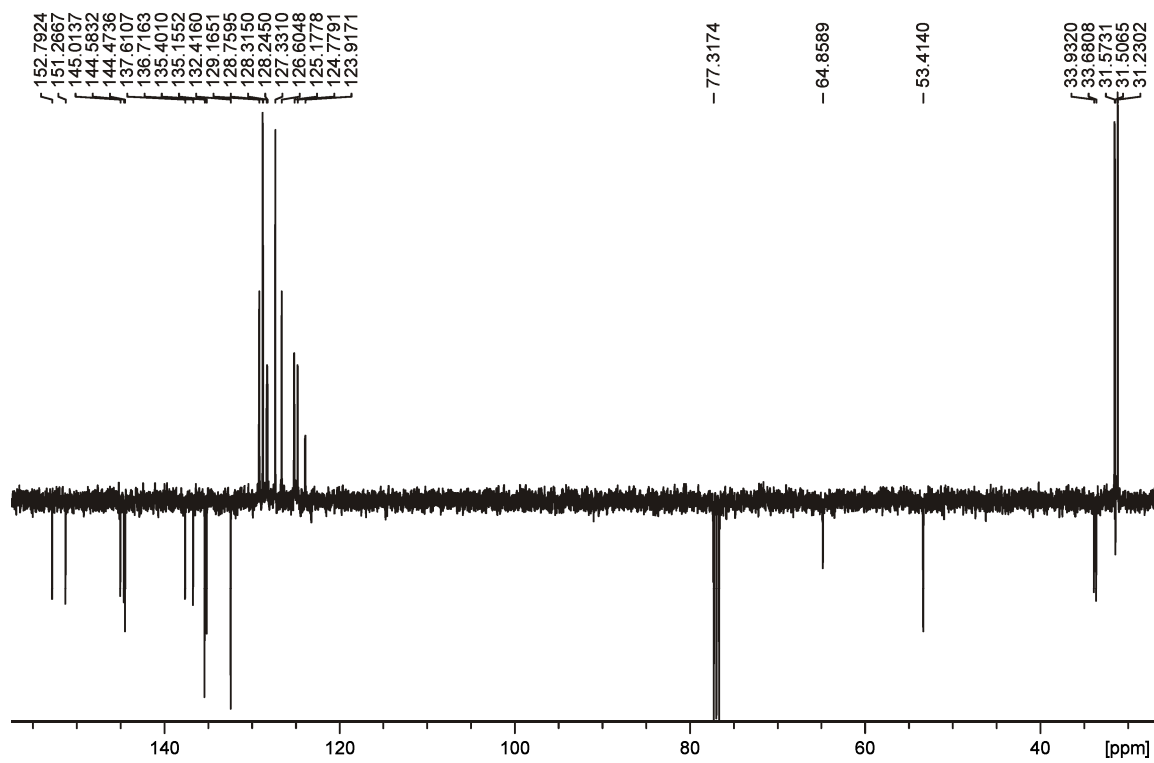

**Figure S26.** <sup>13</sup>C NMR spectrum (APT) of bis(calix[4]arene) (*E,E*)-**23** (100 MHz, CDCl<sub>3</sub>).

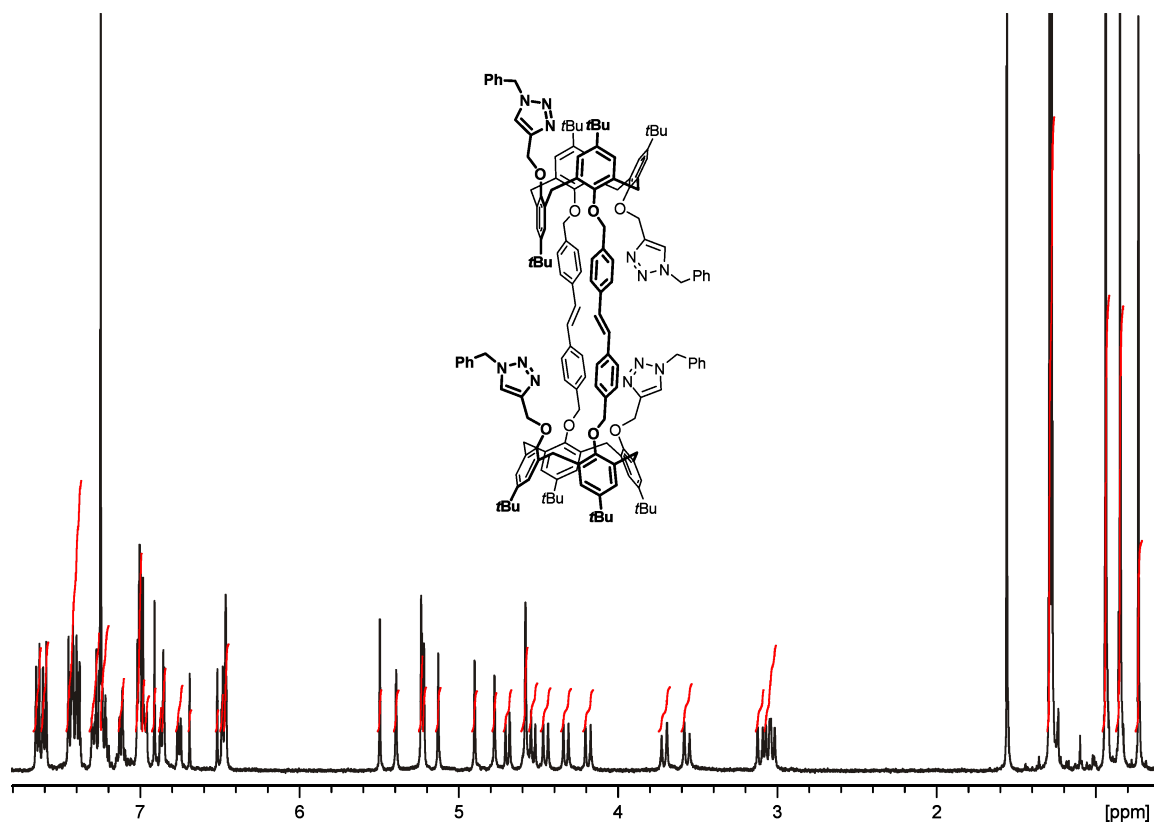

**Figure S27.**  $^1\text{H}$  NMR spectrum of bis(calix[4]arene) (*E,E*)-**24** (400 MHz,  $\text{CDCl}_3$ ).

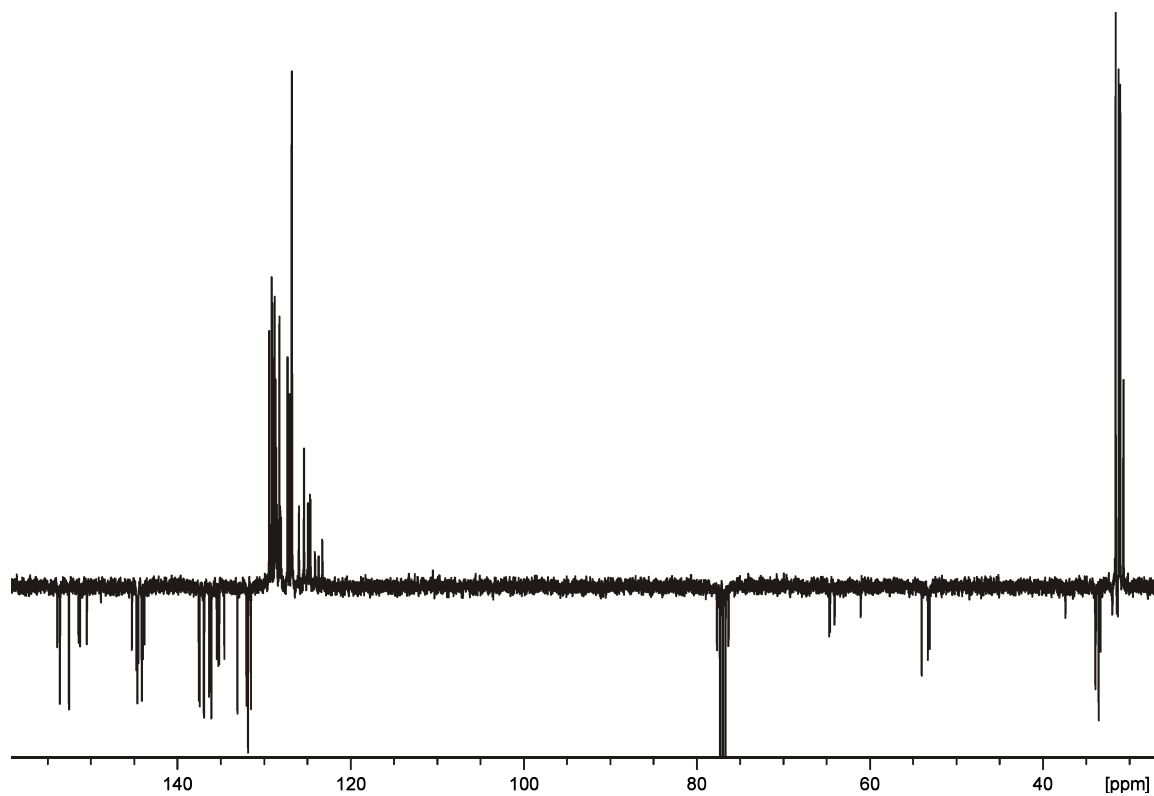

**Figure S28.**  $^{13}\text{C}$  NMR spectrum (APT) of bis(calix[4]arene) (*E,E*)-**24** (100 MHz,  $\text{CDCl}_3$ ).



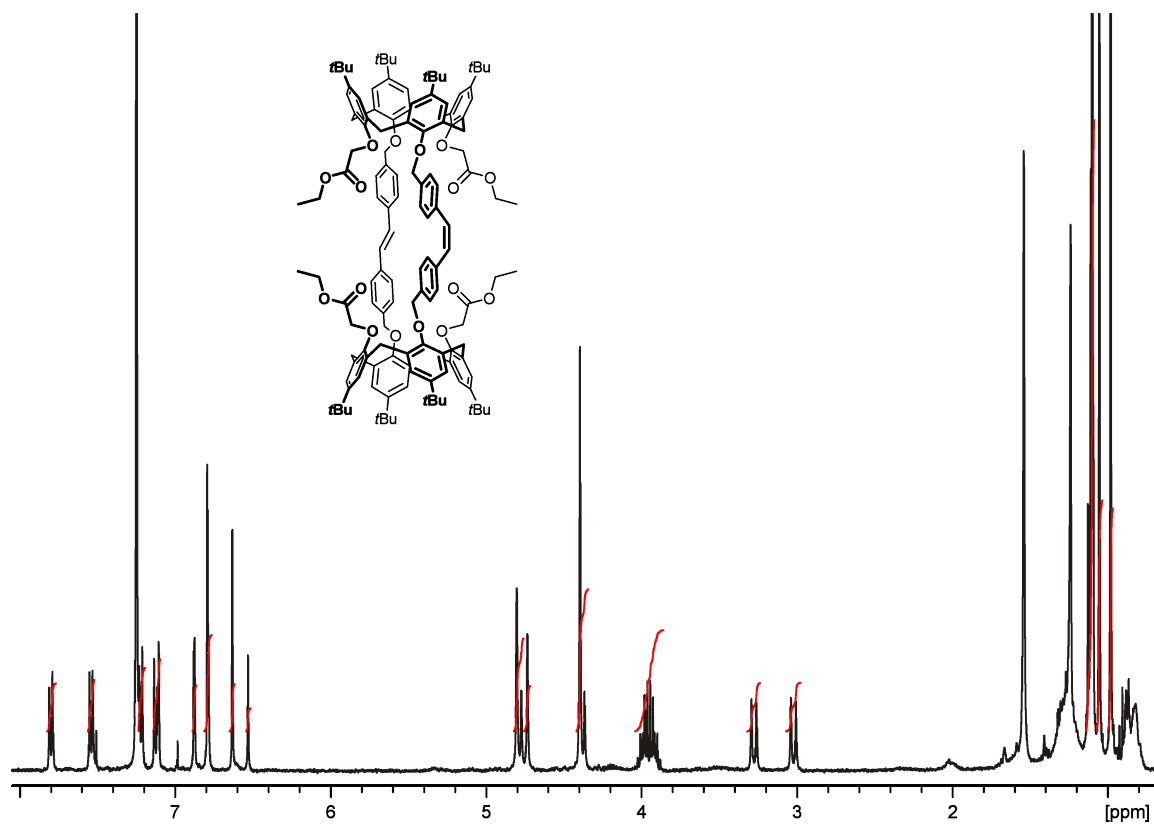

**Figure S29.** <sup>1</sup>H NMR spectrum of bis(calix[4]arene) (*E,Z*)-**14** (400 MHz, CDCl<sub>3</sub>).

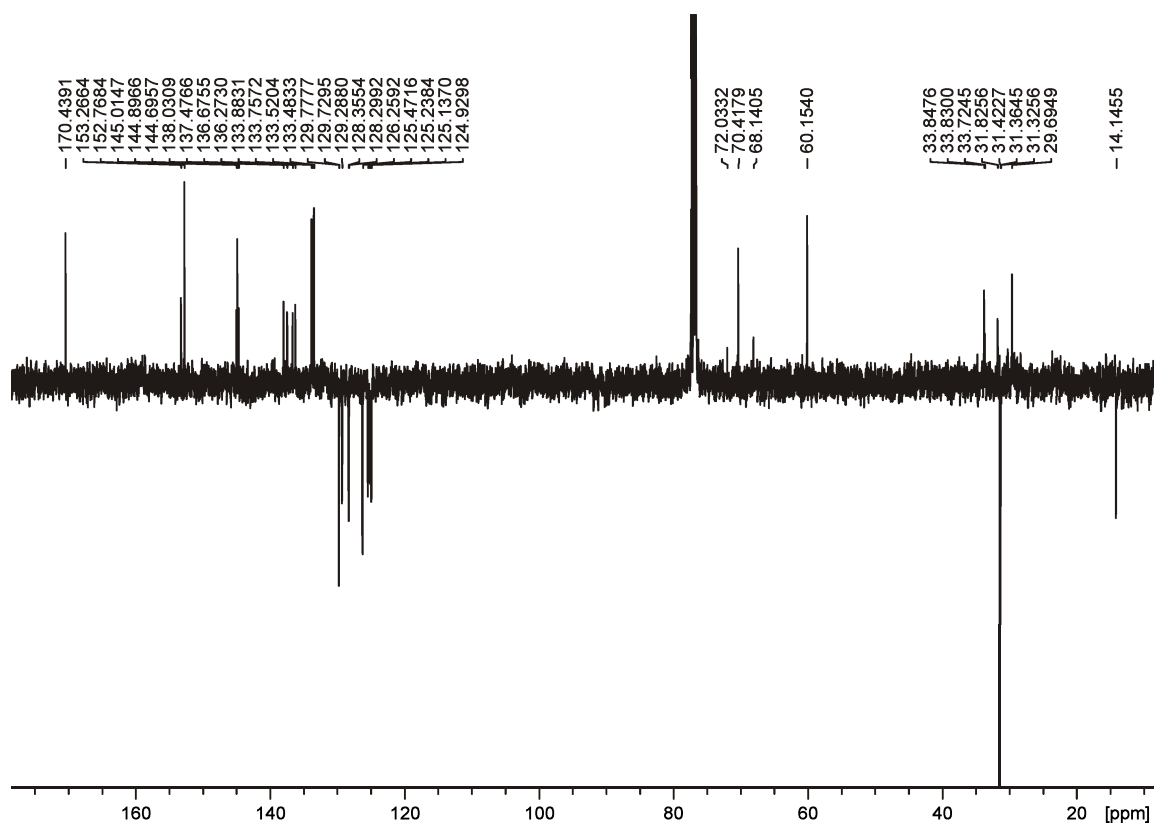

**Figure S30.** <sup>13</sup>C NMR spectrum (APT) of bis(calix[4]arene) (*E,Z*)-**14** (100 MHz, CDCl<sub>3</sub>).

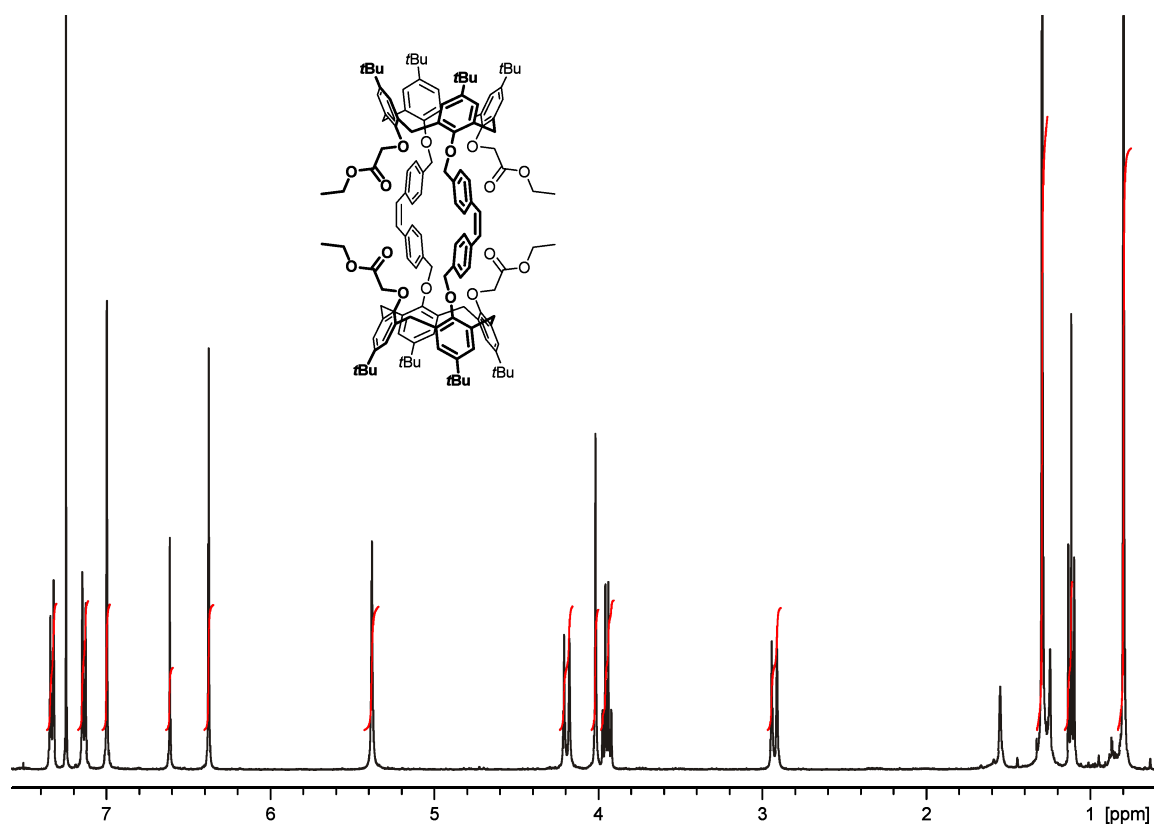

**Figure S31.** <sup>1</sup>H NMR spectrum of bis(calix[4]arene) (Z,Z)-14 (400 MHz, CDCl<sub>3</sub>).

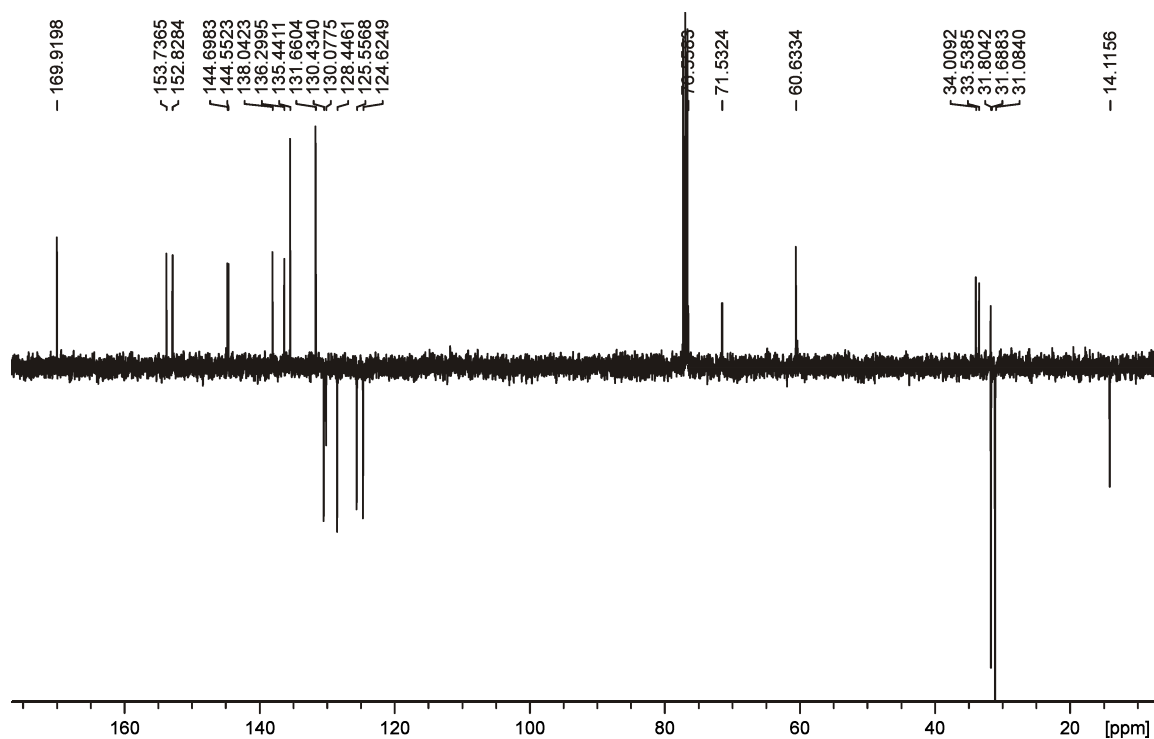

**Figure S32.** <sup>13</sup>C NMR spectrum (APT) of bis(calix[4]arene) (Z,Z)-14 (100 MHz, CDCl<sub>3</sub>).

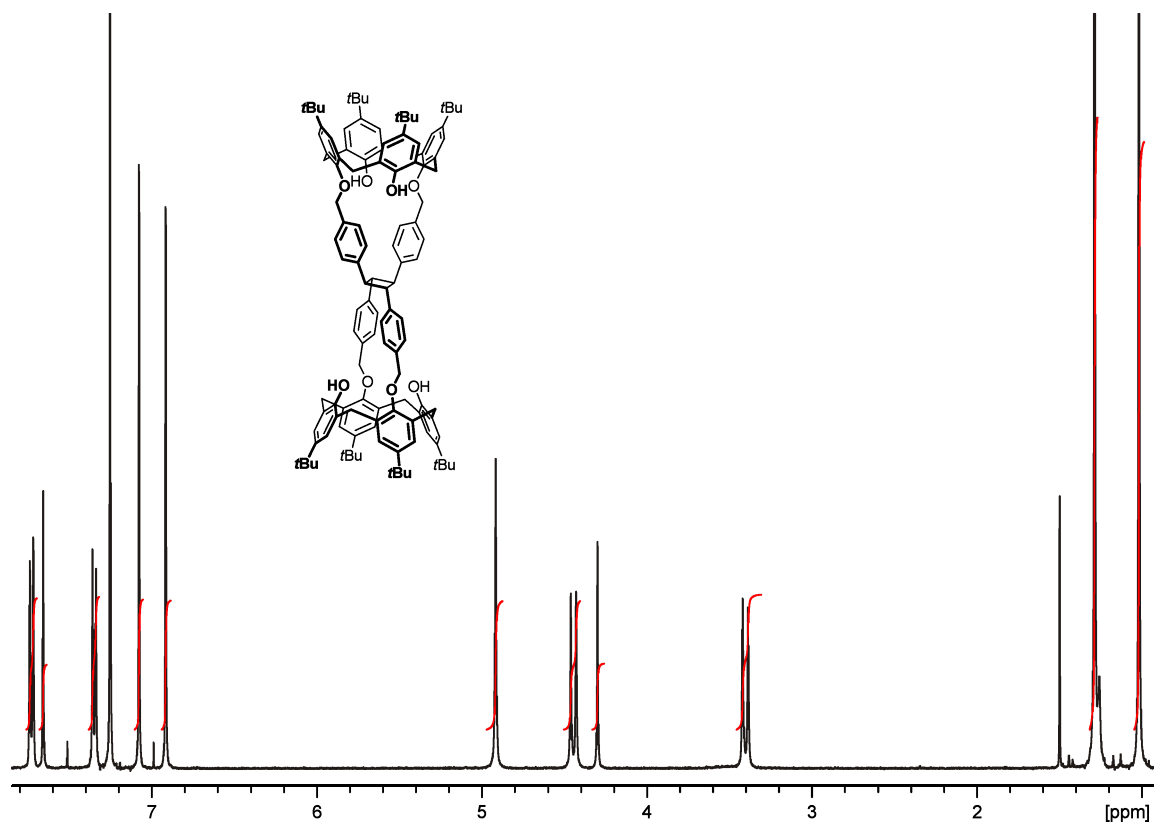

**Figure S33.** <sup>1</sup>H NMR spectrum of bis(calix[4]arene) **25** (400 MHz, CDCl<sub>3</sub>).

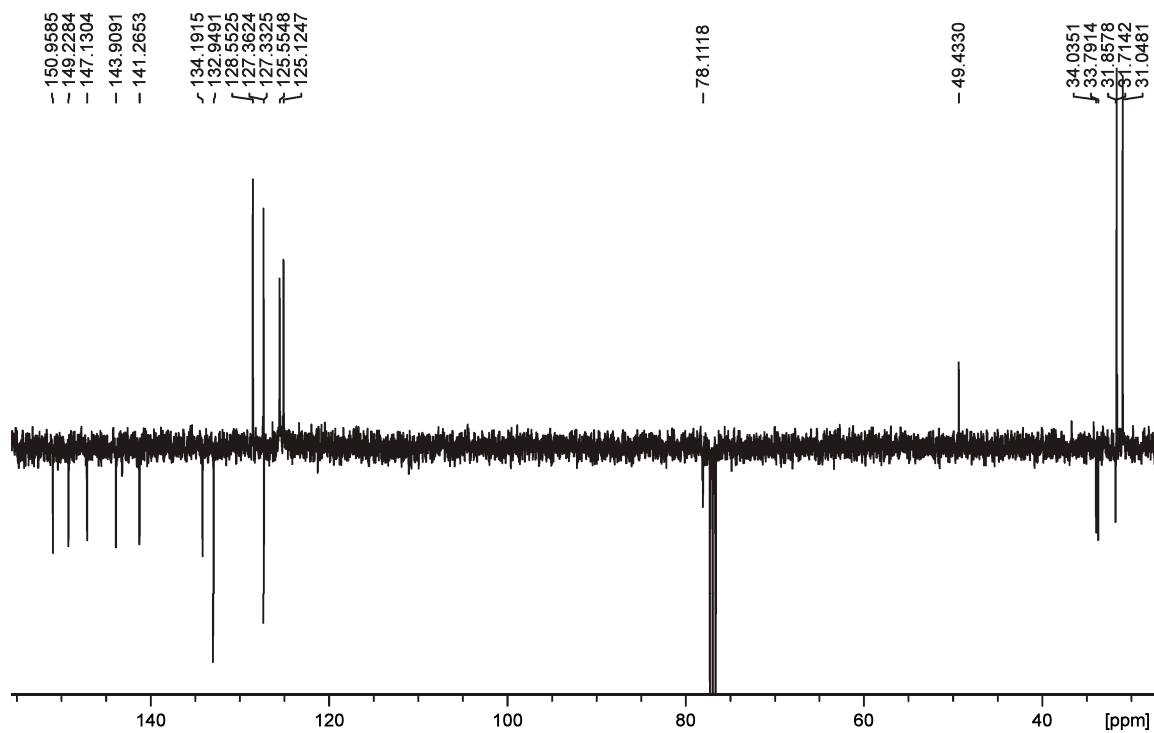

**Figure S34.** <sup>13</sup>C NMR spectrum (APT) of bis(calix[4]arene) **25** (100 MHz, CDCl<sub>3</sub>).

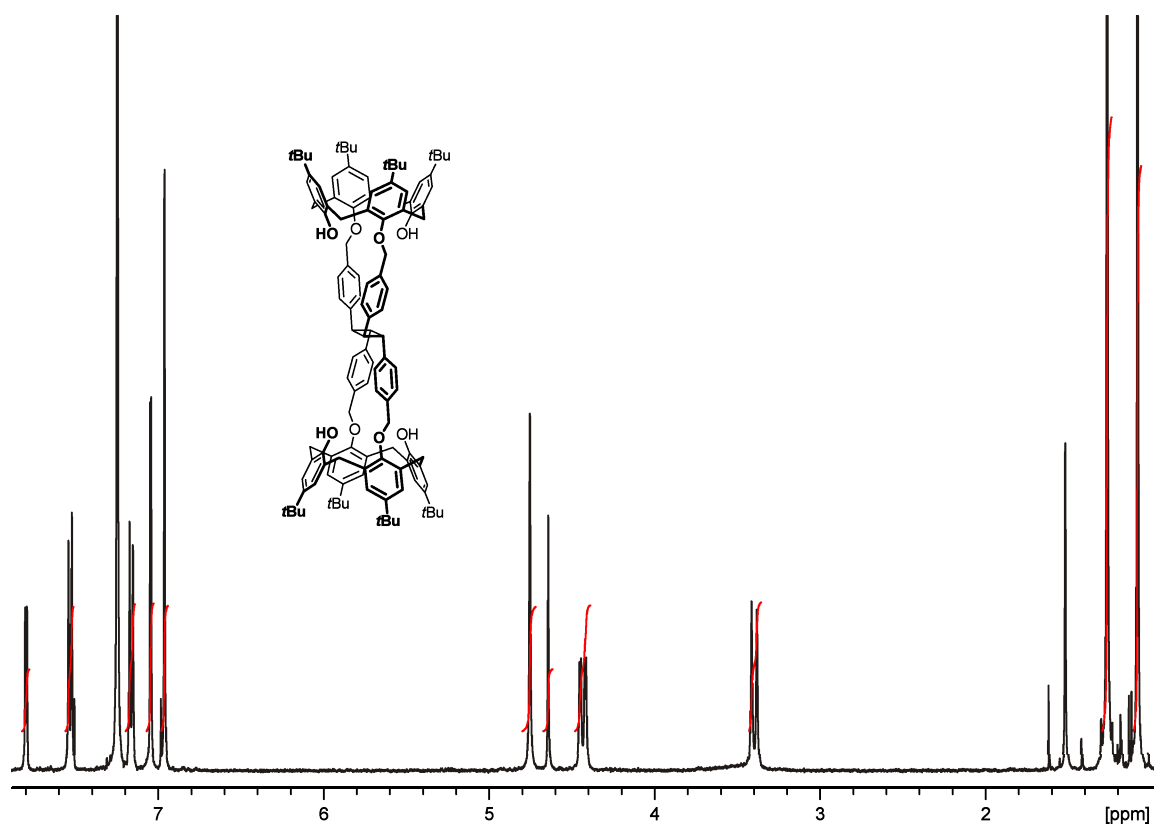

**Figure S35.** <sup>1</sup>H NMR spectrum of bis(calix[4]arene) **26** (400 MHz, CDCl<sub>3</sub>).

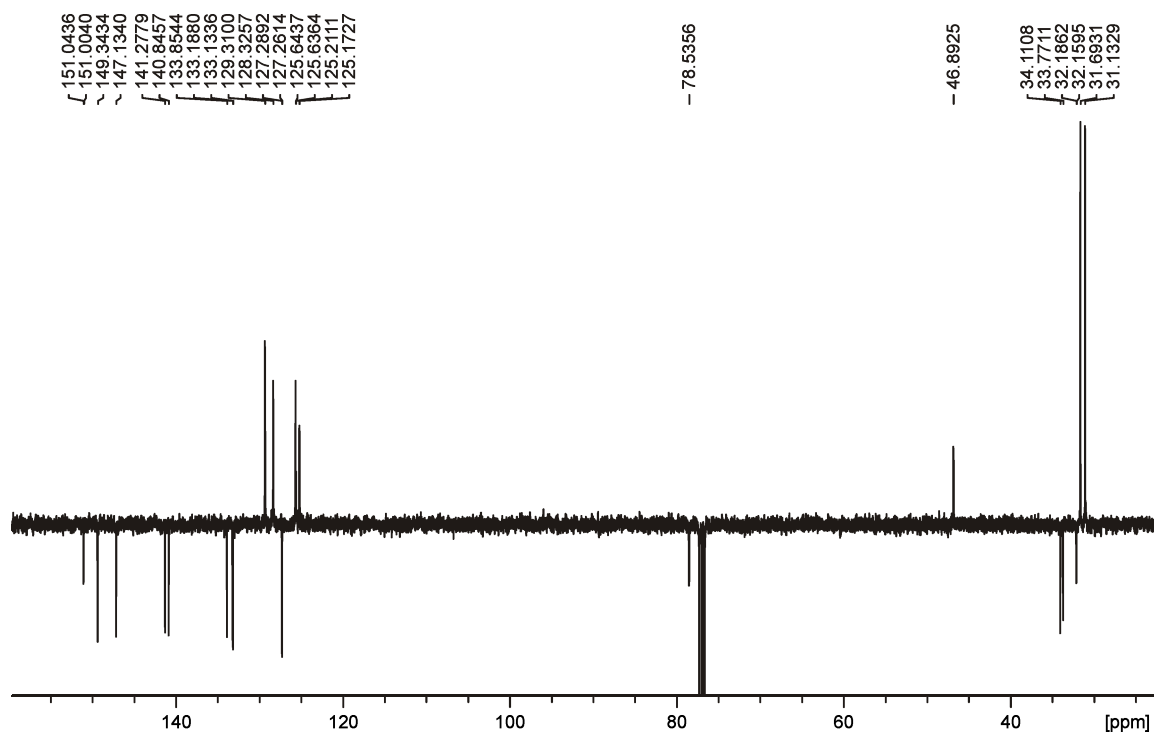

**Figure S36.** <sup>13</sup>C NMR spectrum (APT) of bis(calix[4]arene) **26** (100 MHz, CDCl<sub>3</sub>).

## DOSY spectra of bis(calixarene) tetrakis(esters)

2D DOSY experiments were performed in accordance with the gradient strength  $G = 53.5$  G/cm using standard pulse program ledbpgp2s, that is, stimulated echo sequence and LED (longitudinal eddy current delay) using bipolar gradient pulse pair and two spoiling gradients. The gradient strength was changed from 2 to 95% with linear type of ramp. Diffusion time (big delta,  $\Delta = 40$  ms), sine shaped gradient pulse length (little delta,  $\delta = 2$  ms) and relaxation delay ( $D1 = 2$  s) were employed.

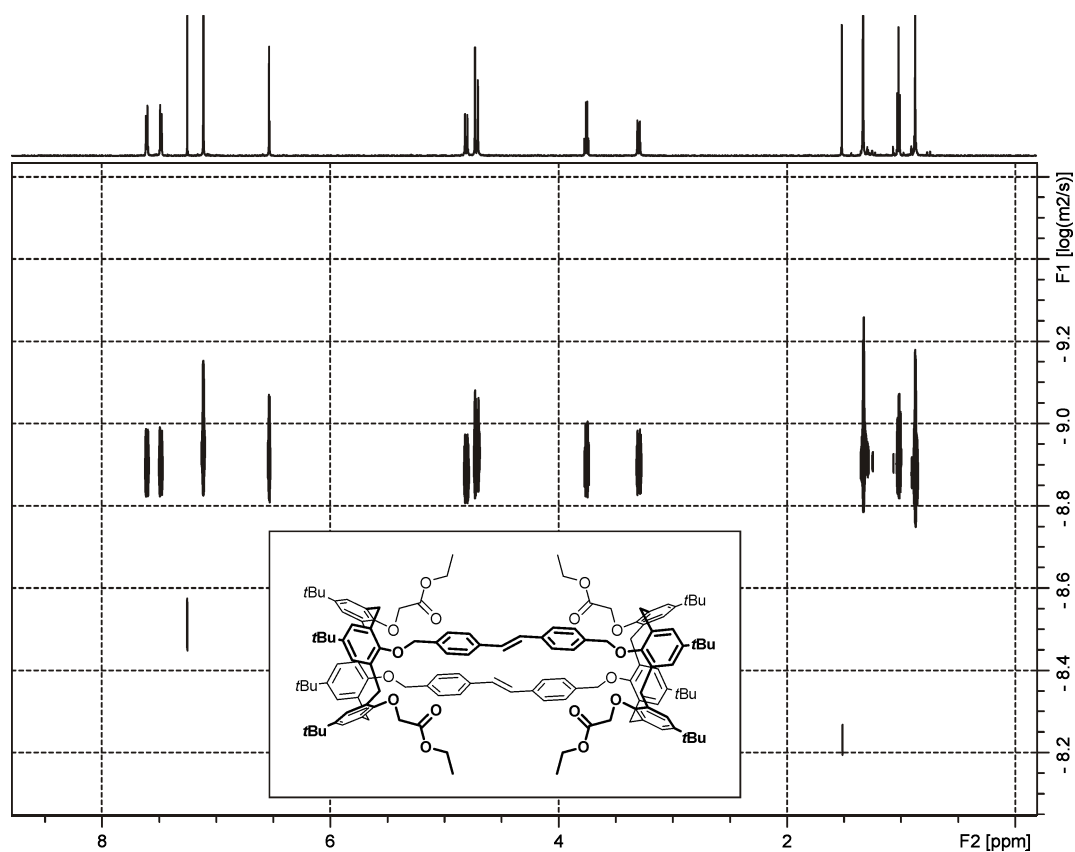

**Figure S37.** 2D DOSY spectrum of bis(calix[4]arene) (*E,E*)-**14** (600 MHz,  $\text{CDCl}_3$ , 30 °C).

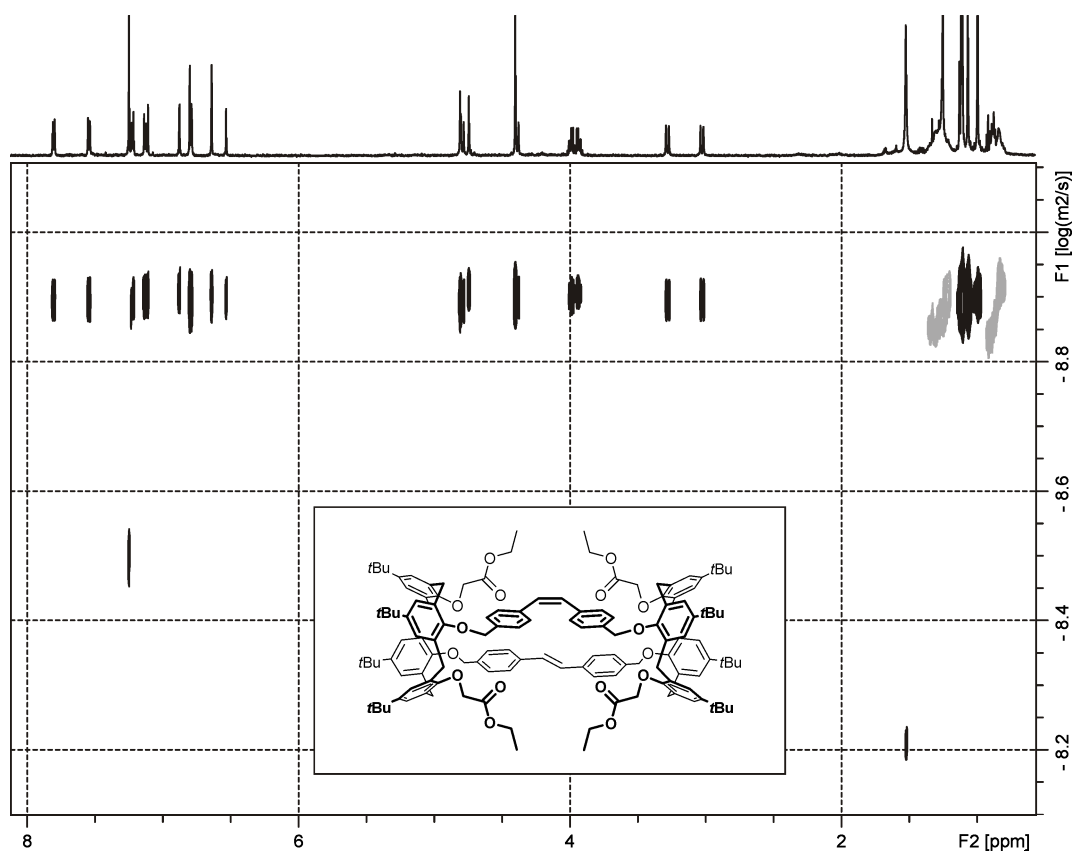

**Figure S38.** 2D DOSY spectrum of bis(calix[4]arene) (*E,Z*)-**14** (600 MHz, CDCl<sub>3</sub>, 30 °C).

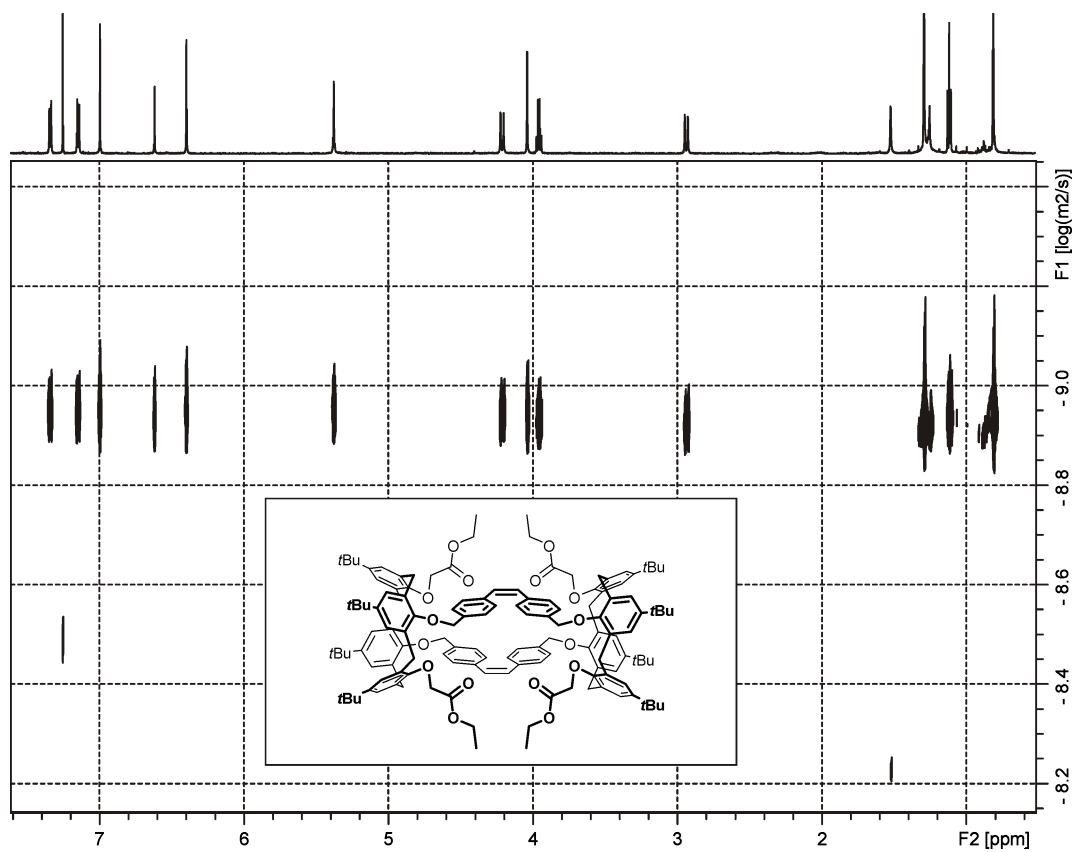

**Figure S39.** 2D DOSY spectrum of bis(calix[4]arene) (*Z,Z*)-**14** (600 MHz, CDCl<sub>3</sub>, 30 °C).



## ***Details of X-ray diffraction measurements***

Crystallographic data were collected on a Bruker D8 Venture diffractometer using graphite monochromatized Mo–K $\alpha$  radiation ( $\lambda = 0.71073 \text{ \AA}$ ) using a  $\omega$ -scan mode. Temperatures above 100 K were used because of destruction of the crystals at lower temperatures. Absorption correction based on measurements of equivalent reflections was applied.<sup>[S8]</sup> The structure was solved by direct methods and refined by full matrix least-squares on  $F^2$  with anisotropic thermal parameters for all non-hydrogen atoms using Olex2 package.<sup>[S9]</sup> For **25**, an attempt to refine the structure in the Cc space group (subgroup of C2/c) with two crystallographically independent cyclobutane molecules was done, but the refinement, although provided slightly smaller R-factor, was unstable because of poor data collected from the only very thin needle. Minor components (occupancy 0.4) of the disordered O–CH<sub>2</sub>–COOEt fragment in (*E,E*)-**14** and (*Z,Z*)-**14**, a minor component (occupancy 0.25) of the –CH=CH– unit in (*E,E*)-**11** and minor components (occupancies 0.25–0.5) of four *tert*-butyl groups in **26** were refined isotropically. Hydrogen atoms were placed in calculated positions and refined using a riding model. In all the structures, part or all of highly disordered solvent chloroform, dichloromethane, methanol and/or ether molecules were not located and their contribution was suppressed by the SQUEEZE procedure.<sup>[S10]</sup> In all the structures, some *tert*-butyl-groups were disordered over two positions with occupancies in the range from 0.75/0.25 to 0.5/0.5. In (*E,E*)-**14** and (*E,E*)-**11**, probably due to a pedal motion,<sup>[S11]</sup> the stilbene moieties were orientationally disordered with occupancies 0.55/0.45, 0.65/0.35 and 0.75/0.25. Crystallographic details are presented in Table S1, S2.

Table S1. Details of the X-ray crystal data collection and structure refinement for compounds (*E,E*)-**11**, (*E,E*)-**13**, (*E,E*)-**14** and (*E,E*)-**22**.

| Compound                                       | ( <i>E,E</i> )- <b>11</b>                                                             | ( <i>E,E</i> )- <b>13</b>                                        | ( <i>E,E</i> )- <b>14</b>                                                                        | ( <i>E,E</i> )- <b>22</b>                                                             |
|------------------------------------------------|---------------------------------------------------------------------------------------|------------------------------------------------------------------|--------------------------------------------------------------------------------------------------|---------------------------------------------------------------------------------------|
| Formula                                        | C <sub>120</sub> H <sub>136</sub> O <sub>8</sub> ·0.16CH <sub>2</sub> Cl <sub>2</sub> | C <sub>132</sub> H <sub>156</sub> N <sub>4</sub> O <sub>16</sub> | C <sub>136</sub> H <sub>160</sub> O <sub>16</sub> ·<br>·CH <sub>3</sub> CN·0.55CHCl <sub>3</sub> | C <sub>156</sub> H <sub>168</sub> N <sub>16</sub> O <sub>8</sub> ·4CH <sub>3</sub> OH |
| M <sub>w</sub>                                 | 1719.87                                                                               | 2054.61                                                          | 2157.34                                                                                          | 2523.24                                                                               |
| Temperature (K)                                | 150(2)                                                                                | 100(2)                                                           | 150(2)                                                                                           | 100(2)                                                                                |
| Size (mm)                                      | 0.20 x 0.13 x 0.02                                                                    | 0.10 x 0.02 x 0.01                                               | 0.40 x 0.38 x 0.35                                                                               | 0.22 x 0.16 x 0.04                                                                    |
| Cryst. system                                  | monoclinic                                                                            | triclinic                                                        | monoclinic                                                                                       | triclinic                                                                             |
| Space group                                    | C2/c                                                                                  | P-1                                                              | P2 <sub>1</sub> /c                                                                               | P-1                                                                                   |
| <i>a</i> (Å)                                   | 23.5379(9)                                                                            | 11.2996(7)                                                       | 29.0349(14)                                                                                      | 10.8722(6)                                                                            |
| <i>b</i> (Å)                                   | 27.0914(10)                                                                           | 12.7069(8)                                                       | 20.9050(9)                                                                                       | 12.1396(7)                                                                            |
| <i>c</i> (Å)                                   | 20.4914(8)                                                                            | 26.6933(16)                                                      | 27.5569(12)                                                                                      | 27.5768(16)                                                                           |
| $\alpha$ (°)                                   | 90                                                                                    | 82.782(2)                                                        | 90                                                                                               | 82.805(2)                                                                             |
| $\beta$ (°)                                    | 118.2510(10)                                                                          | 84.101(2)                                                        | 116.270(2)                                                                                       | 83.520(2)                                                                             |
| $\gamma$ (°)                                   | 90                                                                                    | 69.056(2)                                                        | 90                                                                                               | 77.440(2)                                                                             |
| V (Å <sup>3</sup> )                            | 11510.4(8)                                                                            | 3544.2(4)                                                        | 14998.8(12)                                                                                      | 3510.8(3)                                                                             |
| Z                                              | 4                                                                                     | 1                                                                | 4                                                                                                | 1                                                                                     |
| $\theta$ range (deg)                           | 1.96 < $\theta$ < 25.05                                                               | 1.40 < $\theta$ < 25.05                                          | 1.25 < $\theta$ < 26.40                                                                          | 1.93 < $\theta$ < 26.05                                                               |
| collected/<br>/unique rflns                    | 113899 / 10168                                                                        | 58552 / 12556                                                    | 364981 / 30763                                                                                   | 57615 / 13851                                                                         |
| Completeness<br>to $\theta$ (%)                | 99.8                                                                                  | 99.8                                                             | 99.9                                                                                             | 100.0                                                                                 |
| data/<br>/restraints/<br>/params               | 10168 / 17 / 563                                                                      | 12556 / 77 / 609                                                 | 30763 / 132 / 1468                                                                               | 13851 / 15 / 863                                                                      |
| Goodness of fit<br>on $F^2$                    | 1.062                                                                                 | 1.057                                                            | 1.041                                                                                            | 1.046                                                                                 |
| Final <i>R</i> indices<br>( $I > 2\sigma(I)$ ) | R1 = 0.0779<br>wR2 = 0.2105                                                           | R1 = 0.1176<br>wR2 = 0.3130                                      | R1 = 0.1026<br>wR2 = 0.3095                                                                      | R1 = 0.0606<br>wR2 = 0.1629                                                           |
| Largest diff<br>peak/hole (e/Å <sup>3</sup> )  | 0.94 / -0.98                                                                          | 0.81 / -0.58                                                     | 1.49 / -1.15                                                                                     | 0.67 / -0.62                                                                          |

Table S2. Details of the X-ray crystal data collection and structure refinement for compounds (*E,E*)-**23**, (*Z,Z*)-**14**, **25** and **26**.

| Compound                                       | ( <i>E,E</i> )- <b>23</b>                                        | ( <i>Z,Z</i> )- <b>14</b>                                                                | <b>25</b>                                        | <b>26</b>                                                               |
|------------------------------------------------|------------------------------------------------------------------|------------------------------------------------------------------------------------------|--------------------------------------------------|-------------------------------------------------------------------------|
| Formula                                        | C <sub>160</sub> H <sub>172</sub> N <sub>12</sub> O <sub>8</sub> | C <sub>136</sub> H <sub>160</sub> O <sub>16</sub> ·<br>·C <sub>4</sub> H <sub>10</sub> O | C <sub>120</sub> H <sub>136</sub> O <sub>8</sub> | C <sub>120</sub> H <sub>136</sub> O <sub>8</sub> ·1.5CH <sub>3</sub> CN |
| M <sub>w</sub>                                 | 2391.09                                                          | 2124.75                                                                                  | 1738.32                                          | 1767.56                                                                 |
| Temperature (K)                                | 100(2)                                                           | 120(2)                                                                                   | 100(2)                                           | 100(2)                                                                  |
| Size (mm)                                      | 0.30 x 0.18 x 0.10                                               | 0.15 x 0.02 x 0.02                                                                       | 0.10 x 0.02 x 0.01                               | 0.12 x 0.02 x 0.01                                                      |
| Cryst. system                                  | monoclinic                                                       | monoclinic                                                                               | monoclinic                                       | triclinic                                                               |
| Space group                                    | P2 <sub>1</sub> /c                                               | C2/c                                                                                     | C2/c                                             | P-1                                                                     |
| <i>a</i> (Å)                                   | 29.4689(11)                                                      | 50.315(9)                                                                                | 59.363(3)                                        | 24.1545(11)                                                             |
| <i>b</i> (Å)                                   | 24.4754(9)                                                       | 10.1088(15)                                                                              | 16.5023(10)                                      | 24.3029(11)                                                             |
| <i>c</i> (Å)                                   | 20.8841(8)                                                       | 24.881(4)                                                                                | 27.4781(17)                                      | 24.3840(11)                                                             |
| $\alpha$ (°)                                   | 90                                                               | 90                                                                                       | 90                                               | 71.5030(10)                                                             |
| $\beta$ (°)                                    | 93.4950(10)                                                      | 103.860(4)                                                                               | 102.084(2)                                       | 80.835(2)                                                               |
| $\gamma$ (°)                                   | 90                                                               | 90                                                                                       | 90                                               | 89.852(2)                                                               |
| V (Å <sup>3</sup> )                            | 15034.9(10)                                                      | 12286(3)                                                                                 | 26322(3)                                         | 13383.7(11)                                                             |
| Z                                              | 4                                                                | 4                                                                                        | 8                                                | 4                                                                       |
| $\theta$ range (deg)                           | 1.80 < $\theta$ < 25.05                                          | 1.69 < $\theta$ < 25.00                                                                  | 1.40 < $\theta$ < 25.11                          | 1.41 < $\theta$ < 25.11                                                 |
| collected/<br>/unique rflns                    | 222364 / 26610                                                   | 43874 / 10667                                                                            | 100401 / 23195                                   | 133009 / 47140                                                          |
| Completeness<br>to $\theta$ (%)                | 99.9                                                             | 98.6                                                                                     | 98.8                                             | 98.8                                                                    |
| data/<br>/restraints/<br>/params               | 26610 / 63 / 1600                                                | 10667 / 33 / 712                                                                         | 23195 / 150 / 1064                               | 47140 / 282 / 2072                                                      |
| Goodness of fit<br>on $F^2$                    | 1.025                                                            | 1.008                                                                                    | 2.496                                            | 1.021                                                                   |
| Final <i>R</i> indices<br>( $I > 2\sigma(I)$ ) | R1 = 0.0762<br>wR2 = 0.2092                                      | R1 = 0.1185<br>wR2 = 0.3140                                                              | R1 = 0.2469<br>wR2 = 0.6036                      | R1 = 0.1393<br>wR2 = 0.4071                                             |
| Largest diff<br>peak/hole (e/Å <sup>3</sup> )  | 0.60 / -0.44                                                     | 0.40 / -0.15                                                                             | 1.46 / -1.13                                     | 0.76 / -0.67                                                            |

## References

- S1. C. Zhang and N. Jiao, Copper-catalyzed aerobic oxidative dehydrogenative coupling of anilines leading to aromatic azo compounds using dioxygen as an oxidant, *Angew. Chem. Int. Ed.*, 2010, **49**, 6174–6177.
- S2. W. A. Velema, M. van der Toorn, W. Szymanski and B. L. Feringa, Design, synthesis, and inhibitory activity of potent, photoswitchable mast cell activation inhibitors, *J. Med. Chem.*, 2013, **56**, 4456–4464.
- S3. A. C. Freydank, M. G. Humphrey, R. W. Friedrich and B. Luther-Davies, Synthesis and optical characterization of unsymmetrical oligophenylenevinylenes, *Tetrahedron*, 2002, **58**, 1425–1432.
- S4. Y. Xu, M. D. Smith, J. A. Krause and L. S. Shimizu, Control of the intramolecular [2+2] photocycloaddition in a bis-stilbene macrocycle, *J. Org. Chem.*, 2009, **74**, 4874–4877.
- S5. C. D. Gutsche and M. Iqbal, *p*-tert-Butylcalix[4]arene, *Org. Synth.*, 1990, **68**, 234–237.
- S6. C. D. Gutsche and L.-G. Lin, Calixarenes. 12. The synthesis of functionalized calixarenes, *Tetrahedron*, 1986, **42**, 1633–1640.
- S7. (a) B. D. Wall, Y. Zhou, S. Mei, H. A. M. Ardoña, A. L. Ferguson and J. D. Tovar, Variation of formal hydrogen-bonding networks within electronically delocalized  $\pi$ -conjugated oligopeptide nanostructures, *Langmuir*, 2014, **30**, 11375–11385; (b) J. D. Tovar, Organic halogenation chemistry as a vital tool for the construction of functional  $\pi$ -conjugated materials, *Synthesis*, 2011, 2387–2391; (c) T. Huang, T. Chen and L.-B. Han, Oxidative dephosphorylation of benzylic phosphonates with dioxygen generating symmetrical *trans*-stilbenes, *J. Org. Chem.*, 2018, **83**, 2959–2965.
- S8. G. M. Sheldrick, A short history of SHELX, *Acta Crystallogr.*, 2008, **A64**, 112–122.
- S9. O. V. Dolomanov, L. J. Bourhis, R. J. Gildea, J. A. K. Howard and H. Puschmann, OLEX2: a complete structure solution, refinement and analysis program, *J. Appl. Cryst.*, 2009, **42**, 339–341.
- S10. A. L. Spek, Single-crystal structure validation with the program PLATON, *J. Appl. Crystallogr.*, 2003, **36**, 7–13.
- S11. J. Harada and K. Ogawa, Invisible but common motion in organic crystals: a pedal motion in stilbenes and azobenzenes, *J. Am. Chem. Soc.*, 2001, **123**, 10884–10888.
